# Supplementary material
Source: PubMed Central journal article supplement (PMC2519897)
Supplement: NIHMS58171-supplement-supplement.pdf [file NIHMS58171-supplement-supplement.pdf]

**SUPPLEMENTARY MATERIAL  
FOR ORTLUND, BRIDGHAM, REDINBO AND THORNTON**

**CONTENTS**

Materials and Methods

Fig. S1. Crystal structures of AncCR-LBD with cortisol and DOC

Fig. S2. Electron density for hormones in AncCR's ligand pocket

Fig. S3. Conserved hydrogen-bond network supporting *trans*-activation by AncCR

Fig. S4. Timing of the GR functional shift is robust to alternative reconstructions

Fig. S5. Protein sequence alignment of AncCR, AncGR1, and AncGR2

Fig. S6. Structural map of historical substitutions in the AncGR1-AncGR2 interval

Fig. S7. Effect of key historical substitutions on extant receptors

Fig. S8. Superposition of AncCR, AncGR1, and AncGR2 structures

Fig. S9. Permissive substitution Y27R does not change the function of AncGR1

Fig. S10. Complete corticosteroid receptor phylogeny

Table S1. Data collection and refinement statistics for AncCR crystal structures

Table S2. Maximum likelihood sequence and posterior probabilities of AncGR1

Table S3. Maximum likelihood sequence and posterior probabilities of AncGR2

Table S4. Effect of permissive substitutions on AncGR1 ligand sensitivity

Table S5. List of sequences used for phylogenetic analysis

References for Supplemental Data

## MATERIALS AND METHODS

***Ancestral sequence inference and synthesis.*** Ancestral protein sequences of AncCR, AncGR1, and AncGR2 were inferred by maximum likelihood (1) using PAML 3.15 software on the maximum likelihood phylogeny of 60 amino acid sequences of extant steroid and related receptors (see ref. (2) for details and support measures). For ancestral reconstruction, the JTT+G model (supported with 100% posterior probability in the Bayesian analysis) was assumed. Ancestral sequences of the ligand-binding domain (LBD) and carboxy-terminal extension (CTE) were back-translated assuming human codon bias, synthesized (GenScript, Piscataway, NJ), and verified by sequencing. Plausible alternate states were defined as those with posterior probability greater than 0.20 (see Supplemental data and discussion). Mutagenesis to explore alternate sequence reconstructions and to recapitulate evolutionary substitutions was performed using the QuikChange kit (Stratagene, La Jolla, CA) and verified by sequencing.

***Functional assays.*** Reconstructed ancestral receptor LBDs (including the carboxy-terminal extension, CTE) were fused to human GR hinge (amino acids 460-503) and subcloned in GAL4-pSG5-DBD (gift of D. Furlow). For extant receptors, hinge+LBD+CTE was amplified by polymerase chain reaction using high-fidelity Phusion enzyme (NEB, Beverly, MA), verified by sequencing, and subcloned into GAL4-pSG5-DBD. Templates for tetrapod GR and MR were from *Homo sapiens* and teleost GR was from *Astatotilapia burtoni*, provided by B. Darimont, R. Evans and R. Fernald, respectively. Elasmobranch GR was isolated from *Leucoraja erinacea* as described (2).

Chinese hamster ovary (CHO-K1) cells were transfected using 1 ng of receptor plasmid, 100 ng of a UAS-driven firefly luciferase reporter (pFR-luc), and 0.1 ng of the constitutive pRLtk Renilla luciferase reporter in 96-well plates using Lipfectamine Plus in Optimem (Invitrogen, Carlsbad, CA). After four hours incubation, transfection medium was replaced with phenol red-free  $\alpha$ MEM supplemented with 10% dextran-charcoal-stripped fetal bovine serum (Hyclone, Logan, UT). After overnight recovery, cells were incubated in triplicate with hormone for 24 hours, then assayed by luminometry using the Dual-Glo luciferase system (Promega, Madison, WI). Firefly luciferase activity was normalized by Renilla luciferase. Dose-response relationships were estimated using non-linear regression, with sensitivity reported as the EC50 (Prism Software, Graphpad Software Inc., San Diego, CA). Receptor-ligand combinations are reported as “No activation” if the calculated EC50 is >5000 nM or maximal activation was <2-fold over vehicle alone.

***Protein Expression, Crystallization, and Structural Analysis.*** AncCR-LBD cDNA (residues 1-247), was cloned into pMALCH10T (a gift of J. Tesmer). Mutation C71S was introduced to enhance protein expression and solubility. AncCR C71S was expressed as a maltose-binding protein/TEVfusion protein in BL21(DE3) pLys cells in the presence of 50  $\mu$ M ligand using standard methods, and purified using affinity chromatography (HIS-Select, Sigma, St. Louis, MO). Following TEV cleavage, the tagged fusion protein was removed by an additional nickel affinity column and AncCR was polished via gel filtration. Pure AncCR LBD was dialyzed against 200 mM sodium chloride, 50  $\mu$ M HEPES (pH 7.8) and 50  $\mu$ M CHAPS, and concentrated to 3-7 mg/mL. Mutants were

introduced using QuikChange (Stratagene, LaJolla, CA) methods confirmed by sequencing.

Crystals of AncCR-LBD with ligand were grown by hanging drop vapor diffusion at 22 °C from solutions containing 0.75 µL of protein at 3-7 mg/mL protein and 0.75 µL of the following crystallant: 9.5%-15% PEG 3350, 5% glycerol, and 50 mM Bis-Tris, pH 6.4. The addition of a 19 amino acid peptide derived from NR box 1 of human SHP ( $^+H_3N$ -QGAASRPAILYALLSSSLK-CO $_2^-$ ) synthesized by SynPep, Dublin, CA) was required for crystal formation. Crystals were cryoprotected in crystallant containing 20% glycerol and were flash-cooled in liquid N $_2$ . Data to 1.9, 1.95 and 2.4 Å resolution were collected at 100 K for the AncCR – aldosterone, AncCR – deoxycorticosterone and AncCR – cortisol complexes, respectively. All data were collected either at Stanford Synchrotron Radiation Laboratory beamline 11-1 or the South East Regional Collaborative Access Team at the Advanced Photon Source, and were processed and scaled with HKL2000 (Table S1) (3). Initial phases for the AncCR-cortisol complex were determined using the structure of the mineralocorticoid (MR) LBD (2AA2) as a molecular replacement search model. Subsequent structures were solved using the best available AncCR structure for initial phases. All structures were refined using COOT v.0.9 (4) and CNS v.1.1 (5). The AncCR structures with aldosterone, DOC, and cortisol have PDB accessions 2Q1H, 2Q3Y and 2Q1V. AncGR1 and AncGR2 were expressed and purified using similar methods; despite repeated efforts under a variety of conditions, neither crystallized in a morphology suitable for X-ray analysis.

The homology model for AncGR1 was initially generated using the functionally similar AncCR-cortisol crystal structure as a guide. Residue replacements were

performed in the program COOT using rotamers that approximated the side chain positions in either AncCR or in human GR (1M2Z). The initial AncGR2 homology model was generated using the Swiss-Model homology modeling server (6), using the functionally similar human GR (1M2Z) in complex with dexamethasone as a template. Rotamers were again corrected by hand using COOT. These models were then subject to 200 rounds of energy minimization in the program to correct geometry. Robustness of structural inferences to uncertainty in the ancestral reconstructions was examined by modeling plausible alternative reconstructions ( $PP > 0.20$ ) into the AncCR crystal structure or the AncGR1 and AncGR2 homology models, using rotamers that approximate the side chain positions in the ML AncCR reconstruction or in the human MR and GR. Structures were rendered for display using Pymol software (DeLano Scientific, Palo Alto, CA, USA).

**Fig. S1. Crystal structures of the AncCR LBD with cortisol and DOC.** **A)** Overall structure of the AncCR LBD in complex with cortisol (purple, with red oxygen atoms) and **B)** DOC (orange, with red oxygen atoms) and a peptide derived from the NR Box1 of human SHP (red). Helices are labeled, including the activation function helix, AF-H.

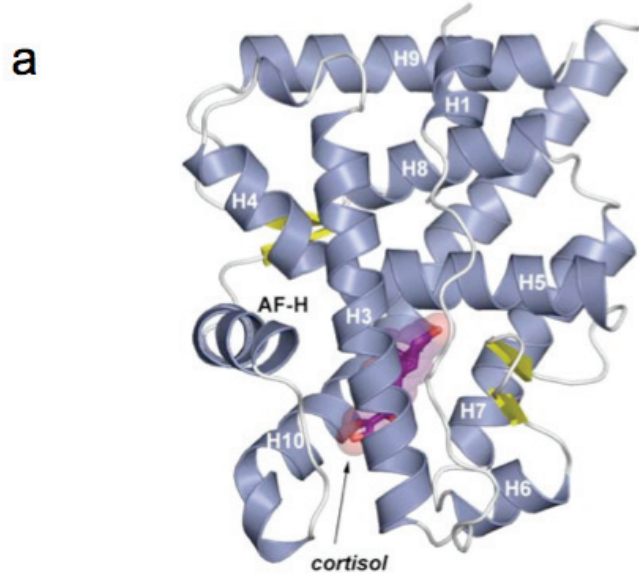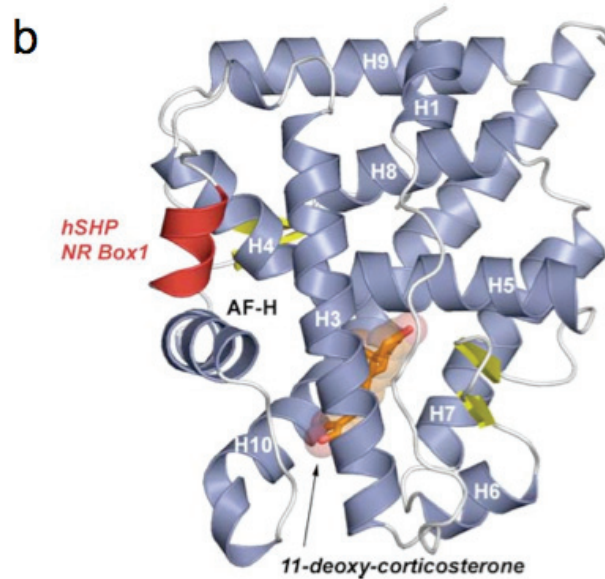

**Fig. S2. Electron density for hormones in the AncCR ligand pocket.**  $F_o-F_c$  simulated annealing omit density contoured at  $2\sigma$  for bound aldosterone, cortisol and DOC at 1.9, 1.95 and 2.4 Å resolution, respectively.

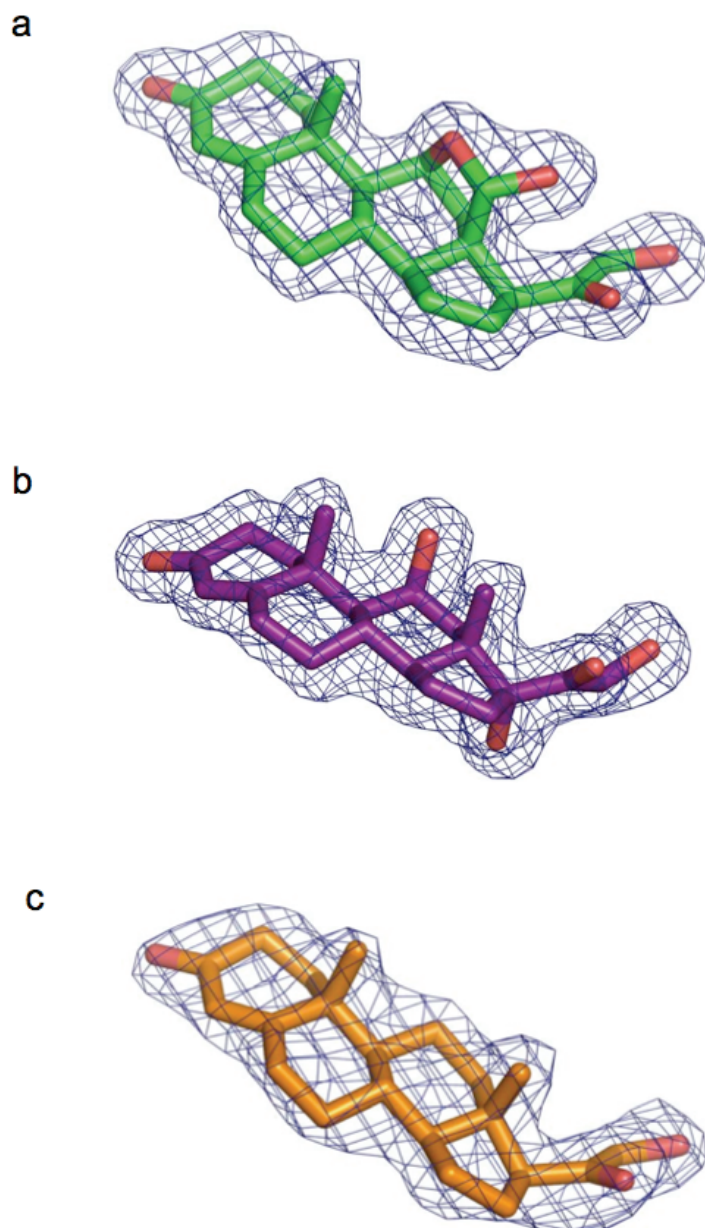

**Fig S3. Conserved H-bond activation network in AncCR.** The network of conserved hydrogen bonds between the ligand, helix 3, helix 10, and the activation helix is shown for AncCR (blue, panel a) and the human MR (purple, panel b) in complex with cortisol (green). Key side chains making stabilizing contacts are shown, with hydrogen-bonds as dotted red lines. Oxygen and nitrogen atoms are red and blue, respectively.

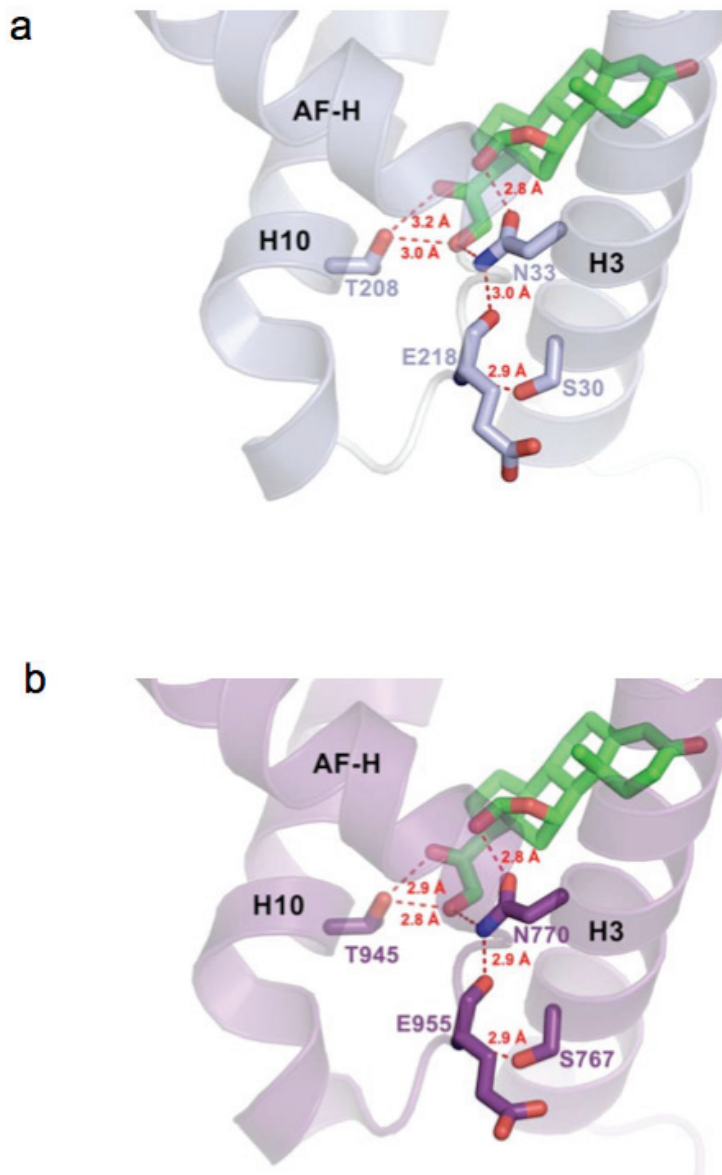



**Fig. S4. Timing of the GR's functional shift is robust to alternative reconstructions.** Sites having alternative ancestral states with posterior probability > 0.20 were defined as ambiguously reconstructed. A) AncGR1 maximum likelihood reconstruction activates transcription in response to aldosterone (squares, black line), DOC (circles, gray line), and cortisol (triangles, dotted line) in a luciferase reporter assay. B-E) Alternate AncGR1 reconstructions do not change function. Of AncGR1's alternate reconstructed states, all but four are found in extant receptors that are sensitive to aldosterone and DOC, indicating that these residues are not sufficient to abolish response to these ligands. These four states (T25S, V120S, K173R, T214S) were introduced into AncGR1 by directed mutagenesis and assayed for transcriptional response. F) AncGR2 maximum likelihood reconstruction is sensitive only to cortisol. G-I) Alternate AncGR2 states do not change function. Of AncGR2's alternate reconstructed states, all but two are found in extant receptors that are sensitive only to cortisol, indicating that these amino acids are not sufficient to confer aldosterone/DOC response. We introduced the others (Y161S and S214T) into AncGR2, but neither changed the response to ligand. One additional alternate reconstruction was in a position that contacts ligand (A74S); introduction of this residue also did not change AncGR2 function. EC50 values are listed in the table. NA, no activation, defined as <2-fold maximal activation and/or EC50>1000 nM.

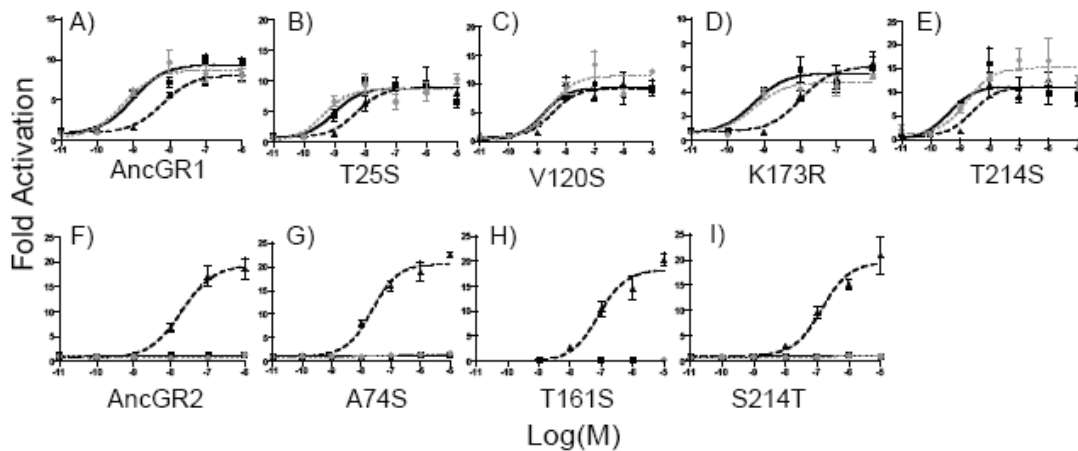

|   |              | Aldosterone | Cortisol | DOC    |
|---|--------------|-------------|----------|--------|
| A | AncGR1       | 0.83nM      | 6.1nM    | 0.57nM |
| B | AncGR1 T25S  | 0.96nM      | 5.2nM    | 0.42nM |
| C | AncGR1 V120S | 1.6nM       | 3.3nM    | 2.7nM  |
| D | AncGR1 K173R | 0.53nM      | 10.0nM   | 0.53nM |
| E | AncGR1 T214S | 0.4nM       | 2.6nM    | 1.7nM  |
| F | AncGR2       | NA          | 29nM     | NA     |
| G | AncGR2 A74S  | NA          | 23nM     | NA     |
| H | AncGR2 T161S | NA          | 82nM     | NA     |
| I | AncGR2 S214T | NA          | 140nM    | NA     |

**Fig. S5. Amino acid sequence alignment of ancestral receptor LBDs.** The sequences of extant and reconstructed ancestral corticosteroid receptors are shown in aligned format. Secondary structural elements are underlined and annotated below the sequences. Blue, substitutions between AncCR and AncGR1; orange, changes between AncGR1 and AncGR2; green, sites that changed between AncCR and AncGR1 and again between AncGR1 and AncGR2. Stars indicate ligand contacting residues. Helices are labeled as in ref. (7).

|               |     |                                                                                                                                                                                                                                                                                                                                                                                                                                                                                                                                                                                                                                                                                                                                                                                                                                                                                                                                                                                                                          |           |             |           |           |           |   |
|---------------|-----|--------------------------------------------------------------------------------------------------------------------------------------------------------------------------------------------------------------------------------------------------------------------------------------------------------------------------------------------------------------------------------------------------------------------------------------------------------------------------------------------------------------------------------------------------------------------------------------------------------------------------------------------------------------------------------------------------------------------------------------------------------------------------------------------------------------------------------------------------------------------------------------------------------------------------------------------------------------------------------------------------------------------------|-----------|-------------|-----------|-----------|-----------|---|
|               |     | 1                                                                                                                                                                                                                                                                                                                                                                                                                                                                                                                                                                                                                                                                                                                                                                                                                                                                                                                                                                                                                        |           | *           | *         | *         | *         | * |
| Ancestral CR  | -2  | <u>P</u> SLISILEAIEPEV <span style="color:blue">V</span> YAGYD <span style="color:blue">N</span> SQPD <span style="color:blue">T</span> NYLL <span style="color:blue">S</span> LNRLAG <span style="color:blue">K</span> Q <span style="color:blue">M</span> VSVV <span style="color:blue">K</span> WAKALPGF <span style="color:blue">R</span> NLH                                                                                                                                                                                                                                                                                                                                                                                                                                                                                                                                                                                                                                                                        |           |             |           |           |           |   |
| Ancestral GR1 |     | <u>P</u> SLISILEVIEPEV <span style="color:blue">L</span> YAGYD <span style="color:blue">S</span> SLPDT <span style="color:blue">T</span> NRL <span style="color:blue">L</span> S <span style="color:blue">S</span> LNRLGGR <span style="color:blue">Q</span> MVSVV <span style="color:blue">K</span> WAKALPGF <span style="color:blue">R</span> NLH                                                                                                                                                                                                                                                                                                                                                                                                                                                                                                                                                                                                                                                                      |           |             |           |           |           |   |
| Ancestral GR2 |     | <u>P</u> TLISLLEVIEPEV <span style="color:blue">L</span> Y <span style="color:blue">S</span> GYD <span style="color:blue">S</span> TLPDT <span style="color:blue">S</span> TRL <span style="color:blue">M</span> S <span style="color:blue">T</span> LNRLGGR <span style="color:blue">Q</span> VVSA <span style="color:blue">V</span> KWAKALPGF <span style="color:blue">R</span> NLH                                                                                                                                                                                                                                                                                                                                                                                                                                                                                                                                                                                                                                    |           |             |           |           |           |   |
| Rat GR        |     | PTLVSLLEVIEPEVLYAGYDSSVPSAWRIMTTLNMLGGRQVIAAVKWAKAILGLRNLH                                                                                                                                                                                                                                                                                                                                                                                                                                                                                                                                                                                                                                                                                                                                                                                                                                                                                                                                                               |           |             |           |           |           |   |
| Rat MR        |     | <u>P</u> SPAMILENIEPETVYAGYD <span style="color:blue">N</span> SKPD <span style="color:blue">T</span> AESLL <span style="color:blue">S</span> TLNRLA <span style="color:blue">A</span> KQMIQV <span style="color:blue">V</span> WAKVLP <span style="color:blue">G</span> F <span style="color:blue">K</span> NLP                                                                                                                                                                                                                                                                                                                                                                                                                                                                                                                                                                                                                                                                                                         |           |             |           |           |           |   |
|               |     | <u>H1</u>                                                                                                                                                                                                                                                                                                                                                                                                                                                                                                                                                                                                                                                                                                                                                                                                                                                                                                                                                                                                                |           | <u>H3</u>   |           |           |           |   |
|               |     |                                                                                                                                                                                                                                                                                                                                                                                                                                                                                                                                                                                                                                                                                                                                                                                                                                                                                                                                                                                                                          | *         | *           | *         | *         | *         | * |
| Ancestral CR  | 58  | <u>L</u> DDQMTLLIQYSW <span style="color:blue">M</span> CLMAF <span style="color:blue">S</span> LGW <span style="color:blue">R</span> SYK <span style="color:blue">H</span> TNG <span style="color:blue">Q</span> MLYFAPDLIF <span style="color:blue">N</span> EERM <span style="color:blue">Q</span> Q <span style="color:blue">S</span> AMYDLC <span style="color:blue">Q</span> GM <span style="color:blue">R</span> Q                                                                                                                                                                                                                                                                                                                                                                                                                                                                                                                                                                                                |           |             |           |           |           |   |
| Ancestral GR1 |     | <u>L</u> DDQMTLLIQYSW <span style="color:blue">M</span> SLMAF <span style="color:blue">S</span> LGW <span style="color:blue">R</span> SYK <span style="color:blue">H</span> SNG <span style="color:blue">N</span> MLYFAPDLIF <span style="color:blue">N</span> EERM <span style="color:blue">Q</span> Q <span style="color:blue">S</span> AMYDLC <span style="color:blue">Q</span> GM <span style="color:blue">R</span> K                                                                                                                                                                                                                                                                                                                                                                                                                                                                                                                                                                                                |           |             |           |           |           |   |
| Ancestral GR2 |     | <u>L</u> DDQMTLLIQYSW <span style="color:blue">M</span> FLMAF <span style="color:blue">S</span> LGW <span style="color:blue">R</span> SYK <span style="color:blue">Q</span> SNG <span style="color:blue">N</span> MLCFAPDLV <span style="color:blue">I</span> N <span style="color:blue">E</span> ERM <span style="color:blue">Q</span> LPYMYD <span style="color:blue">C</span> Q <span style="color:blue">C</span> Q <span style="color:blue">M</span> LK                                                                                                                                                                                                                                                                                                                                                                                                                                                                                                                                                              |           |             |           |           |           |   |
| Rat GR        |     | LDDQMTLLIQYSWFLMAFALGWRSYRQSSGNLLCFAPDLINEQRM <span style="color:blue">S</span> LPCMYD <span style="color:blue">Q</span> CKHMLF                                                                                                                                                                                                                                                                                                                                                                                                                                                                                                                                                                                                                                                                                                                                                                                                                                                                                          |           |             |           |           |           |   |
| Rat MR        |     | <u>L</u> EDQITLLIQYSW <span style="color:blue">M</span> CLS <span style="color:blue">S</span> F <span style="color:blue">A</span> LSW <span style="color:blue">R</span> SYK <span style="color:blue">H</span> TNS <span style="color:blue">Q</span> LLYFAPDLV <span style="color:blue">F</span> N <span style="color:blue">E</span> E <span style="color:blue">K</span> M <span style="color:blue">H</span> Q <span style="color:blue">S</span> AM <span style="color:blue">Y</span> EL <span style="color:blue">C</span> Q <span style="color:blue">G</span> M <span style="color:blue">R</span> Q                                                                                                                                                                                                                                                                                                                                                                                                                      |           |             |           |           |           |   |
|               |     | <u>H4</u>                                                                                                                                                                                                                                                                                                                                                                                                                                                                                                                                                                                                                                                                                                                                                                                                                                                                                                                                                                                                                | <u>H5</u> | <u>β3</u>   | <u>β4</u> | <u>H6</u> | <u>H7</u> |   |
|               |     |                                                                                                                                                                                                                                                                                                                                                                                                                                                                                                                                                                                                                                                                                                                                                                                                                                                                                                                                                                                                                          |           |             |           |           |           |   |
| Ancestral CR  | 118 | <u>I</u> S <span style="color:blue">Q</span> EFVRL <span style="color:blue">Q</span> VT <span style="color:blue">Y</span> EE <span style="color:blue">F</span> LCMKV <span style="color:blue">L</span> LL <span style="color:blue">L</span> STV <span style="color:blue">P</span> KDGLK <span style="color:blue">S</span> Q <span style="color:blue">A</span> S <span style="color:blue">F</span> DE <span style="color:blue">M</span> R <span style="color:blue">M</span> NYIKEL <span style="color:blue">R</span> R <span style="color:blue">A</span> I <span style="color:blue">A</span> K <span style="color:blue">K</span> EN <span style="color:blue">N</span> S                                                                                                                                                                                                                                                                                                                                                   |           |             |           |           |           |   |
| Ancestral GR1 |     | <u>I</u> S <span style="color:blue">V</span> EFVRL <span style="color:blue">Q</span> VT <span style="color:blue">Y</span> EE <span style="color:blue">Y</span> LCMKV <span style="color:blue">L</span> LL <span style="color:blue">L</span> STV <span style="color:blue">P</span> KDGLK <span style="color:blue">S</span> Q <span style="color:blue">A</span> T <span style="color:blue">F</span> DE <span style="color:blue">I</span> R <span style="color:blue">M</span> S <span style="color:blue">Y</span> IKEL <span style="color:blue">G</span> K <span style="color:blue">A</span> I <span style="color:blue">V</span> K <span style="color:blue">K</span> EG <span style="color:blue">N</span> S                                                                                                                                                                                                                                                                                                                 |           |             |           |           |           |   |
| Ancestral GR2 |     | <u>I</u> S <span style="color:blue">S</span> EFVRL <span style="color:blue">Q</span> V <span style="color:blue">S</span> Y <span style="color:blue">D</span> E <span style="color:blue">Y</span> LCMKV <span style="color:blue">L</span> LL <span style="color:blue">L</span> STV <span style="color:blue">P</span> KDGLK <span style="color:blue">S</span> Q <span style="color:blue">A</span> V <span style="color:blue">F</span> DE <span style="color:blue">I</span> R <span style="color:blue">M</span> T <span style="color:blue">Y</span> IKEL <span style="color:blue">G</span> K <span style="color:blue">A</span> I <span style="color:blue">V</span> K <span style="color:blue">K</span> EG <span style="color:blue">N</span> S                                                                                                                                                                                                                                                                               |           |             |           |           |           |   |
| Rat GR        |     | V <span style="color:blue">S</span> SEL <span style="color:blue">Q</span> RL <span style="color:blue">Q</span> V <span style="color:blue">S</span> Y <span style="color:blue">E</span> E <span style="color:blue">Y</span> LCMK <span style="color:blue">T</span> LL <span style="color:blue">L</span> LS <span style="color:blue">S</span> V <span style="color:blue">P</span> KE <span style="color:blue">G</span> LK <span style="color:blue">S</span> Q <span style="color:blue">E</span> LF <span style="color:blue">D</span> E <span style="color:blue">I</span> R <span style="color:blue">M</span> T <span style="color:blue">Y</span> IKEL <span style="color:blue">G</span> K <span style="color:blue">A</span> I <span style="color:blue">V</span> K <span style="color:blue">K</span> EG <span style="color:blue">N</span> S                                                                                                                                                                                 |           |             |           |           |           |   |
| Rat MR        |     | <u>I</u> S <span style="color:blue">L</span> Q <span style="color:blue">E</span> VRL <span style="color:blue">Q</span> L <span style="color:blue">T</span> FEE <span style="color:blue">Y</span> S <span style="color:blue">I</span> M <span style="color:blue">K</span> V <span style="color:blue">L</span> LL <span style="color:blue">L</span> STV <span style="color:blue">P</span> KDGLK <span style="color:blue">S</span> Q <span style="color:blue">A</span> AFE <span style="color:blue">E</span> M <span style="color:blue">R</span> T <span style="color:blue">N</span> Y <span style="color:blue">I</span> KEL <span style="color:blue">R</span> K <span style="color:blue">M</span> V <span style="color:blue">T</span> K <span style="color:blue">C</span> P <span style="color:blue">N</span> S <span style="color:blue">S</span>                                                                                                                                                                          |           |             |           |           |           |   |
|               |     | <u>H7</u>                                                                                                                                                                                                                                                                                                                                                                                                                                                                                                                                                                                                                                                                                                                                                                                                                                                                                                                                                                                                                | <u>H8</u> |             | <u>H9</u> |           |           |   |
|               |     |                                                                                                                                                                                                                                                                                                                                                                                                                                                                                                                                                                                                                                                                                                                                                                                                                                                                                                                                                                                                                          |           | *           | *         | *         | *         |   |
| Ancestral CR  | 178 | <u>S</u> Q <span style="color:blue">N</span> W <span style="color:blue">Q</span> R <span style="color:blue">F</span> Y <span style="color:blue">Q</span> LTKLLDS <span style="color:blue">M</span> H <span style="color:blue">D</span> LVG <span style="color:blue">G</span> LL <span style="color:blue">Q</span> FC <span style="color:blue">F</span> Y <span style="color:blue">T</span> FV <span style="color:blue">Q</span> <span style="color:blue">S</span> Q <span style="color:blue">A</span> LSVE <span style="color:blue">F</span> PE <span style="color:blue">M</span> LV <span style="color:blue">E</span> I <span style="color:blue">I</span> S <span style="color:blue">D</span> Q <span style="color:blue">L</span> P <span style="color:blue">K</span> V <span style="color:blue">M</span> A <span style="color:blue">G</span>                                                                                                                                                                           |           |             |           |           |           |   |
| Ancestral GR1 |     | <u>S</u> Q <span style="color:blue">N</span> W <span style="color:blue">Q</span> R <span style="color:blue">F</span> Y <span style="color:blue">Q</span> LTKLLDS <span style="color:blue">M</span> H <span style="color:blue">D</span> LVG <span style="color:blue">G</span> LL <span style="color:blue">Q</span> FC <span style="color:blue">F</span> Y <span style="color:blue">T</span> FV <span style="color:blue">Q</span> <span style="color:blue">S</span> K <span style="color:blue">T</span> LSVE <span style="color:blue">F</span> PE <span style="color:blue">M</span> LV <span style="color:blue">E</span> I <span style="color:blue">I</span> S <span style="color:blue">N</span> Q <span style="color:blue">L</span> P <span style="color:blue">K</span> V <span style="color:blue">M</span> A <span style="color:blue">G</span>                                                                                                                                                                           |           |             |           |           |           |   |
| Ancestral GR2 |     | <u>S</u> Q <span style="color:blue">N</span> W <span style="color:blue">Q</span> R <span style="color:blue">F</span> Y <span style="color:blue">Q</span> LTKLLDS <span style="color:blue">M</span> H <span style="color:blue">E</span> M <span style="color:blue">V</span> G <span style="color:blue">G</span> LL <span style="color:blue">Q</span> FC <span style="color:blue">F</span> Y <span style="color:blue">T</span> FV <span style="color:blue">N</span> - <span style="color:blue">K</span> S <span style="color:blue">L</span> SVE <span style="color:blue">F</span> PE <span style="color:blue">M</span> L <span style="color:blue">A</span> E <span style="color:blue">I</span> I <span style="color:blue">S</span> N <span style="color:blue">Q</span> L <span style="color:blue">P</span> K <span style="color:blue">F</span> K <span style="color:blue">A</span> G                                                                                                                                       |           |             |           |           |           |   |
| Rat GR        |     | <u>S</u> Q <span style="color:blue">N</span> W <span style="color:blue">Q</span> R <span style="color:blue">F</span> Y <span style="color:blue">Q</span> LTKLLDS <span style="color:blue">M</span> H <span style="color:blue">E</span> V <span style="color:blue">V</span> EN <span style="color:blue">L</span> L <span style="color:blue">T</span> Y <span style="color:blue">C</span> F <span style="color:blue">Q</span> T <span style="color:blue">F</span> LD-K <span style="color:blue">T</span> M <span style="color:blue">S</span> I <span style="color:blue">E</span> F <span style="color:blue">P</span> E <span style="color:blue">M</span> L <span style="color:blue">A</span> E <span style="color:blue">I</span> I <span style="color:blue">T</span> N <span style="color:blue">Q</span> I <span style="color:blue">P</span> K <span style="color:blue">Y</span> S <span style="color:blue">N</span> G                                                                                                     |           |             |           |           |           |   |
| Rat MR        |     | <u>G</u> <span style="color:blue">Q</span> <span style="color:blue">S</span> W <span style="color:blue">Q</span> R <span style="color:blue">F</span> Y <span style="color:blue">Q</span> LTKLLDS <span style="color:blue">M</span> H <span style="color:blue">D</span> L <span style="color:blue">V</span> S <span style="color:blue">D</span> L <span style="color:blue">L</span> E <span style="color:blue">F</span> C <span style="color:blue">F</span> Y <span style="color:blue">T</span> F <span style="color:blue">R</span> E <span style="color:blue">S</span> Q <span style="color:blue">A</span> L <span style="color:blue">K</span> V <span style="color:blue">E</span> F <span style="color:blue">P</span> A <span style="color:blue">M</span> L <span style="color:blue">V</span> E <span style="color:blue">I</span> I <span style="color:blue">T</span> D <span style="color:blue">Q</span> L <span style="color:blue">P</span> K <span style="color:blue">V</span> E <span style="color:blue">S</span> G |           |             |           |           |           |   |
|               |     | <u>H10</u>                                                                                                                                                                                                                                                                                                                                                                                                                                                                                                                                                                                                                                                                                                                                                                                                                                                                                                                                                                                                               |           | <u>AF-H</u> |           |           |           |   |
|               |     |                                                                                                                                                                                                                                                                                                                                                                                                                                                                                                                                                                                                                                                                                                                                                                                                                                                                                                                                                                                                                          |           |             |           |           |           |   |
| Ancestral CR  | 238 | <span style="color:blue">M</span> A <span style="color:blue">K</span> P <span style="color:blue">L</span> L <span style="color:blue">F</span> H <span style="color:blue">K</span> K                                                                                                                                                                                                                                                                                                                                                                                                                                                                                                                                                                                                                                                                                                                                                                                                                                      |           |             |           |           |           |   |
| Ancestral GR1 |     | <span style="color:blue">M</span> A <span style="color:blue">K</span> P <span style="color:blue">L</span> L <span style="color:blue">F</span> H <span style="color:blue">Q</span> K                                                                                                                                                                                                                                                                                                                                                                                                                                                                                                                                                                                                                                                                                                                                                                                                                                      |           |             |           |           |           |   |
| Ancestral GR2 |     | <span style="color:blue">G</span> V <span style="color:blue">K</span> P <span style="color:blue">L</span> L <span style="color:blue">F</span> H <span style="color:blue">Q</span> K                                                                                                                                                                                                                                                                                                                                                                                                                                                                                                                                                                                                                                                                                                                                                                                                                                      |           |             |           |           |           |   |
| Rat GR        |     | <span style="color:blue">N</span> I <span style="color:blue">K</span> K <span style="color:blue">L</span> L <span style="color:blue">F</span> H <span style="color:blue">Q</span> K                                                                                                                                                                                                                                                                                                                                                                                                                                                                                                                                                                                                                                                                                                                                                                                                                                      |           |             |           |           |           |   |
| Rat MR        |     | <span style="color:blue">N</span> A <span style="color:blue">K</span> P <span style="color:blue">L</span> Y <span style="color:blue">F</span> H <span style="color:blue">R</span> K                                                                                                                                                                                                                                                                                                                                                                                                                                                                                                                                                                                                                                                                                                                                                                                                                                      |           |             |           |           |           |   |

**Fig. S6. Structural map of sequence changes in the AncGR1-AncGR2 interval.** Sites that changed from one state in AncGR1 to a different state in AncGR2 are shown mapped on the backbone of the AncGR1 model. Function-changing substitutions in the X, Y, and Z groups are shown with blue spheres for the  $\alpha$ -carbon (light, medium, and dark blue, respectively); red spheres show other substitutions.

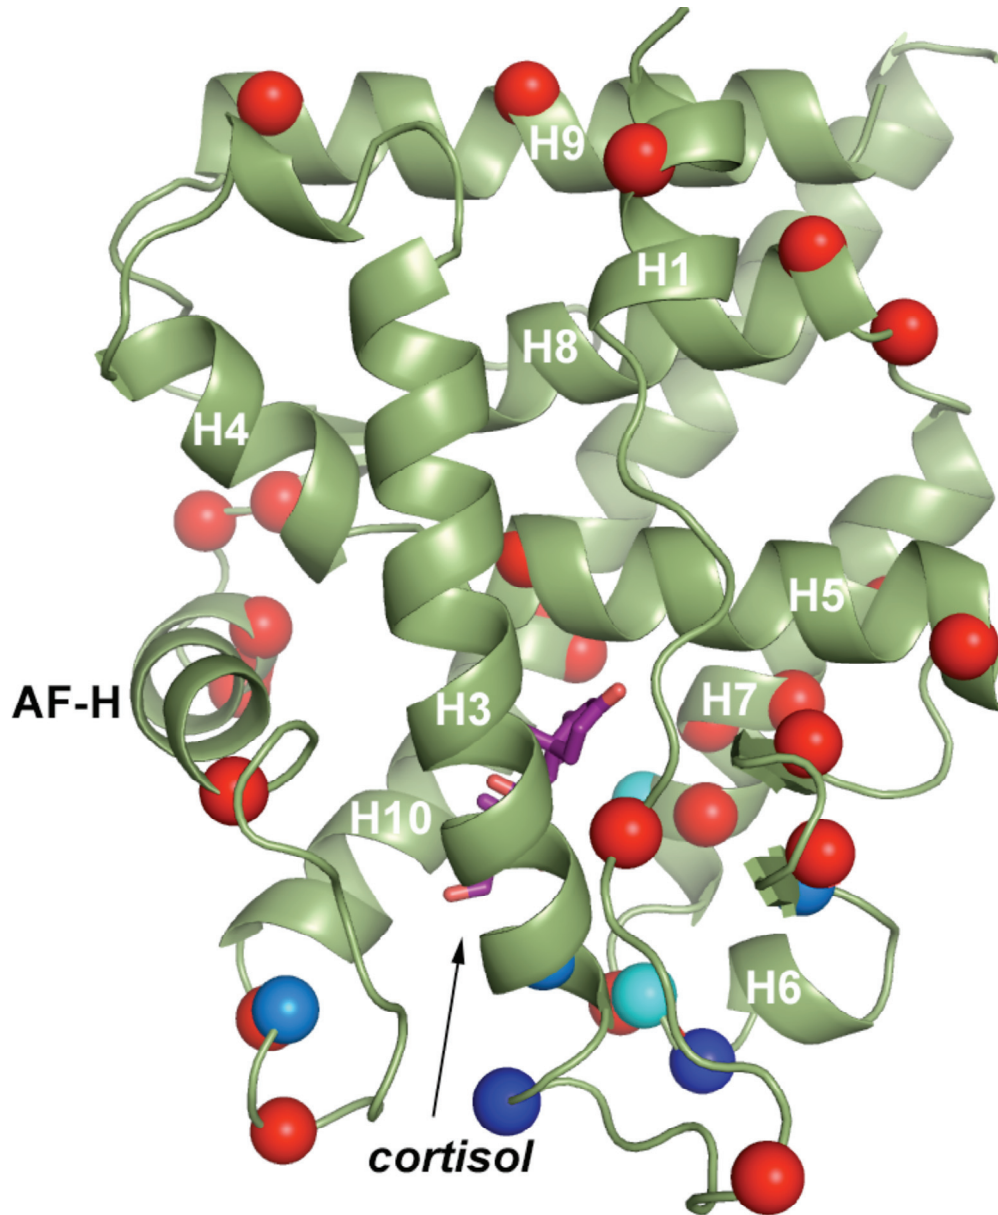

**Fig. S7. Effect of historical mutations on extant receptors.** **A)** Two historical substitutions (S106P and L111Q) that switch ligand preference from aldosterone to cortisol in AncGR1 were introduced into the human MR (numbers correspond to the homologous position in the human sequence). Activation of a luciferase reporter gene by the wild-type and mutant receptor ligand-binding domains is shown in the presence of aldosterone (green), cortisol (purple), and DOC (orange). **B)** The reverse historical substitutions were introduced into the human GR. Bars show SEM for three replicates.

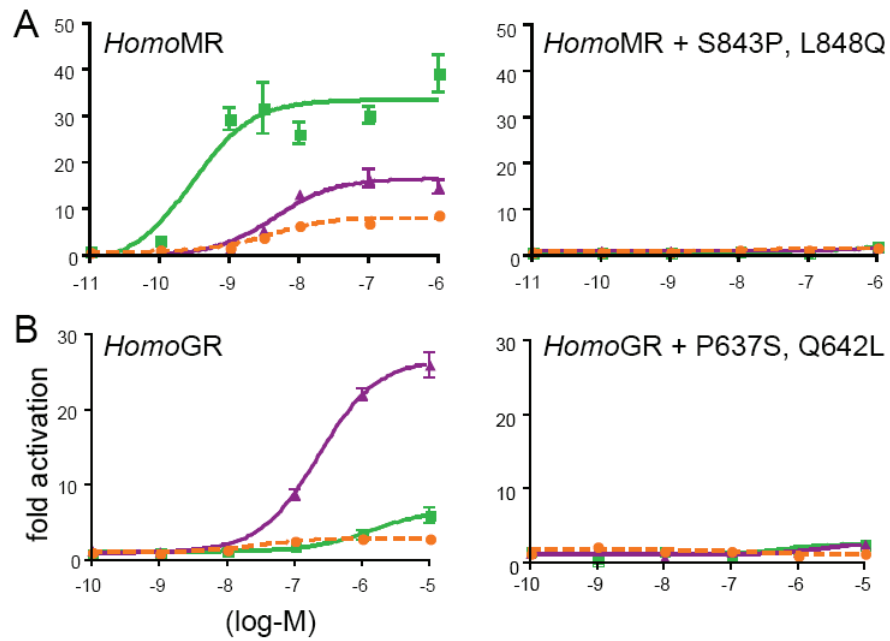

**Fig. S8. Superposition of AncCR, AncGR1, and AncGR2 structures.** The backbones of the AnCR-LBD crystal structure (blue) and the AncGR1 (green) and AncGR2 (yellow) models, all with cortisol, are shown superimposed upon each other. Helices are labeled, including AF-H, the activation-function helix.

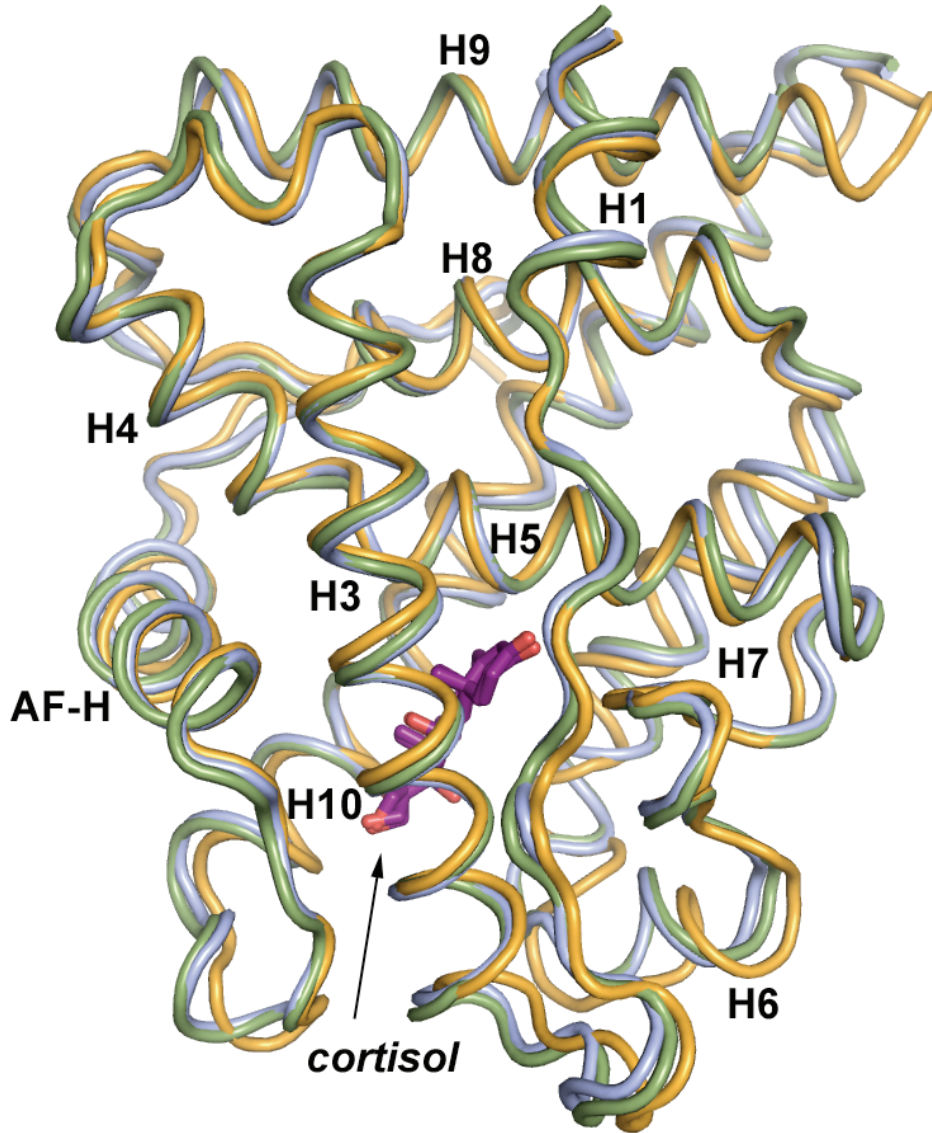

**Fig. S9. Reversing the permissive substitution Y27R does not change the function of AncGR1.** Left panel, transcriptional activation by AncGR1 (which contains an arginine at position 27) in the presence of corticosteroids. Right, activation by a mutant AncGR1 with tyrosine at position 27. Receptor sensitivity to aldosterone (green), cortisol (purple), and DOC (orange) is not changed substantially by the mutation. Fold-increase in activation of luciferase reporter gene is shown in response to increasing hormone concentrations. Error bars show s.e.m. for three replicates.

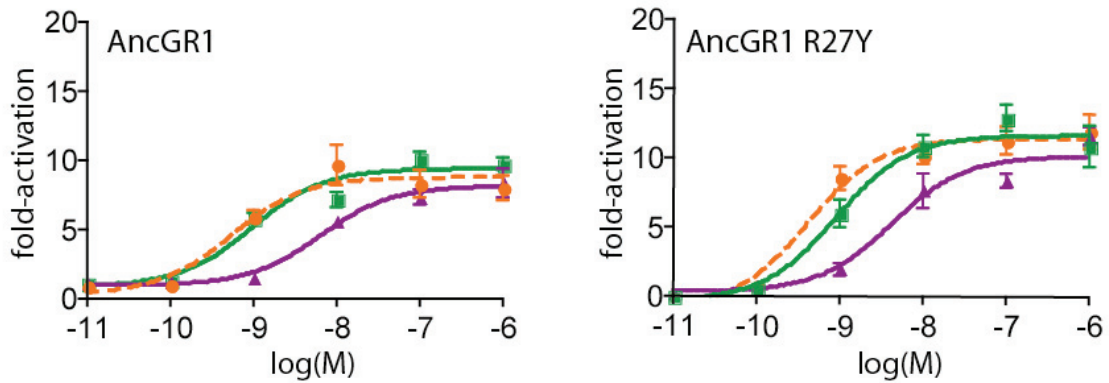

**Fig. S10. Phylogeny of the corticosteroid receptors.** Complete BMCMC phylogeny of the corticoid receptors and other steroid receptors. Branch labels indicate posterior probabilities. The tree is rooted to minimize gene duplications; other rootings require additional duplications and losses. Corticoid receptors in bold. Circles; blue, AncCR, green, AncGR1 and yellow, AncGR2. For analysis parameters, see Methods.

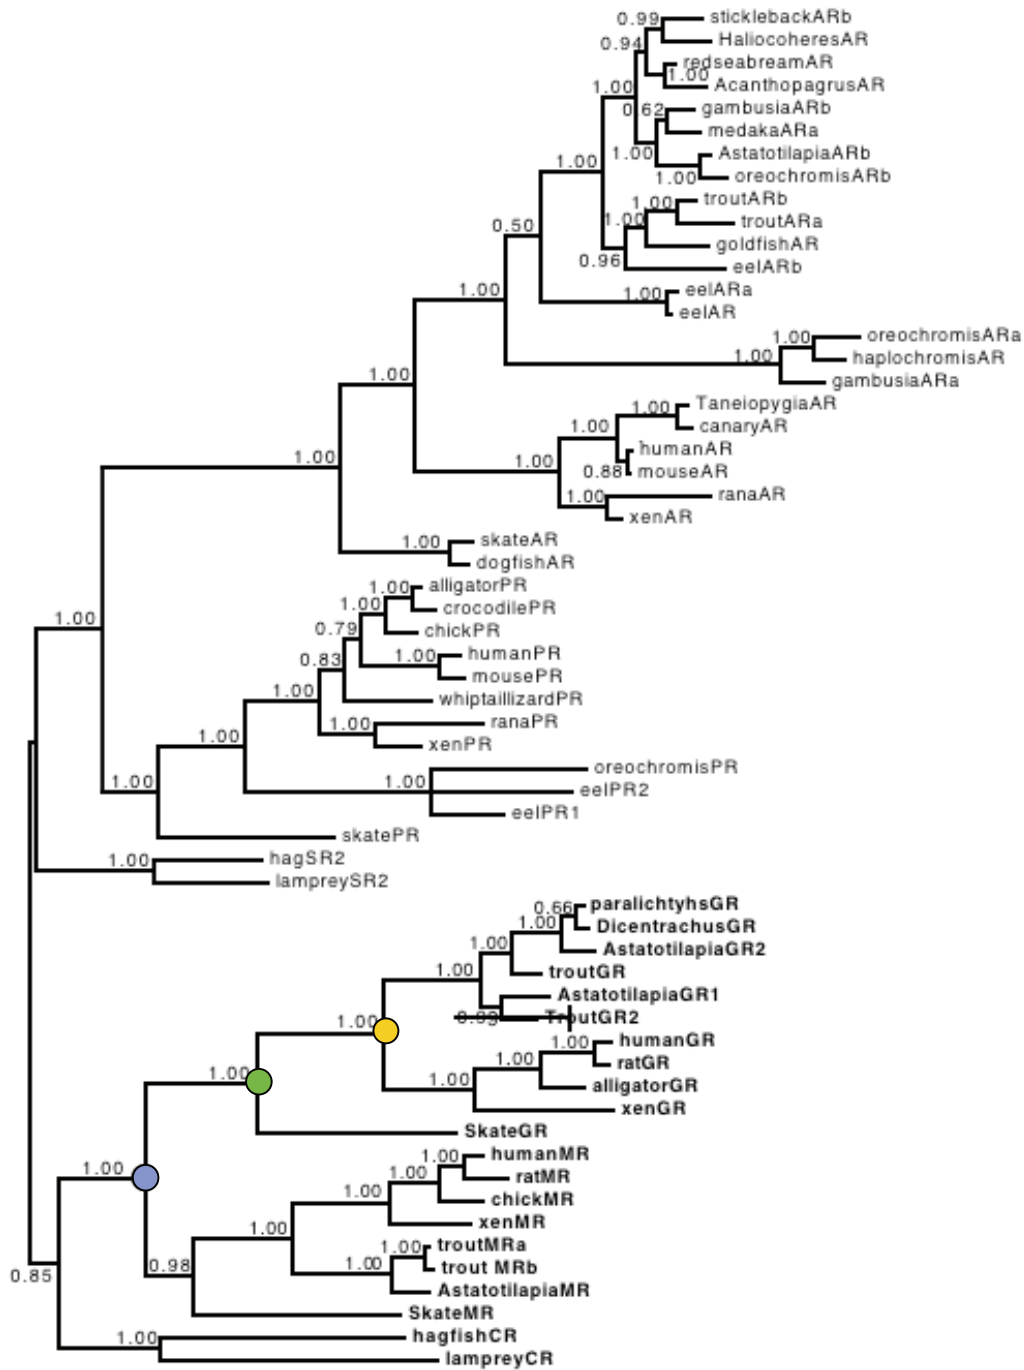

**Table S1. Data collection and refinement statistics for AncCR crystal structures.**

|                                                                     | <b>AncCR – Aldo</b>                    | <b>AncCR – DOC</b>                     | <b>AncCR – Cort</b>                    |
|---------------------------------------------------------------------|----------------------------------------|----------------------------------------|----------------------------------------|
| Resolution (highest shell)                                          | 1.90 Å (1.90 – 1.97 Å)                 | 2.4 Å (2.49 – 2.4 Å)                   | 1.95 Å (2.02 – 1.95 Å)                 |
| Space Group                                                         | P4 <sub>3</sub> 2 <sub>1</sub> 2       | P4 <sub>3</sub> 2 <sub>1</sub> 2       | P4 <sub>3</sub> 2 <sub>1</sub> 2       |
| Unit Cell Dimensions                                                | a=79.7, b=79.7, c=113.9<br>α=β=γ= 90.0 | a=78.9, b=78.9, c=112.5<br>α=β=γ= 90.0 | a=79.9, b=79.9, c=114.6<br>α=β=γ= 90.0 |
| No. of Reflections                                                  | 29610                                  | 14500                                  | 27603                                  |
| R <sup>a</sup> <sub>sym</sub> (highest shell)                       | 3.7% (37.0%)                           | 8.9% (30.1%)                           | 8.0% (36.1%)                           |
| Completeness (highest shell)                                        | 99.9% (100.0%)                         | 99.7% (98.7%)                          | 99.9% (99.6%)                          |
| Ave. Redundancy (highest shell)                                     | 10.1 (10.2)                            | 9.3 (9.2)                              | 7.6 (6.5)                              |
| I/σ                                                                 | 63.8 (7.5)                             | 23.6 (10.1)                            | 17.5 (5.2)                             |
| Monomers per asymmetric unit (AU)                                   | 1                                      | 1                                      | 1                                      |
| No. of protein atoms/AU                                             | 1987                                   | 2065                                   | 1987                                   |
| No. of ligand atoms/AU                                              | 26                                     | 24                                     | 26                                     |
| No. of waters/AU                                                    | 161                                    | 101                                    | 181                                    |
| R <sup>b</sup> <sub>working</sub> (R <sup>c</sup> <sub>free</sub> ) | 20.7% (22.0%)                          | 19.6% (24.0%)                          | 20.7% (23.3%)                          |
| Ave. B-factors, Å <sup>2</sup>                                      |                                        |                                        |                                        |
| Protein                                                             | 31.3                                   | 38.9                                   | 29.5                                   |
| Ligand                                                              | 19.5                                   | 25.7                                   | 17.4                                   |
| Water                                                               | 41.1                                   | 42.6                                   | 38.8                                   |
| r.m.s. deviations                                                   |                                        |                                        |                                        |
| Bond lengths, Å                                                     | 0.005                                  | 0.006                                  | 0.005                                  |
| Bond angles, °                                                      | 1.005                                  | 1.100                                  | 1.100                                  |

<sup>a</sup>  $R_{\text{sym}} = \sum |I - \langle I \rangle| / \sum I$ , where I is the observed intensity and  $\langle I \rangle$  is the average intensity of several symmetry-related observations.

<sup>b</sup>  $R_{\text{working}} = \sum ||F_o| - |F_c|| / \sum |F_o|$ , where F<sub>o</sub> and F<sub>c</sub> are the observed and calculated structure factors, respectively.

<sup>c</sup>  $R_{\text{free}} = \sum ||F_o| - |F_c|| / \sum |F_o|$  for 7% of the data not used at any stage of the structural refinement.



**Table S2. Maximum likelihood reconstruction and posterior probabilities of AncGR1.** Columns show residue position (numbered as in AncCR), maximum likelihood state and posterior probability (PP). LBP: \* residues in the ligand binding pocket that contact hormone. Alternate state lists plausible amino acids other than the ML reconstruction, if any, with posterior probability > 0.2. Final column shows extant aldosterone-activated receptors, if any, that contain the alternate states. AncGR1 has GenBank accession EF631975.

| Site# | ML state | PP    | LBP | Alternate state (if PP>0.2) | PP of alt state | Aldo-activated receptors with alternate state |
|-------|----------|-------|-----|-----------------------------|-----------------|-----------------------------------------------|
| -2    | P        | 1.000 |     |                             |                 |                                               |
| -1    | S        | 0.814 |     |                             |                 |                                               |
| 1     | L        | 0.744 |     |                             |                 |                                               |
| 2     | I        | 0.624 |     | V                           | 0.28            | human MR + 4others                            |
| 3     | S        | 0.997 |     |                             |                 |                                               |
| 4     | I        | 0.869 |     |                             |                 |                                               |
| 5     | L        | 1.000 |     |                             |                 |                                               |
| 6     | E        | 0.995 |     |                             |                 |                                               |
| 7     | V        | 0.368 |     |                             |                 |                                               |
| 8     | I        | 1.000 |     |                             |                 |                                               |
| 9     | E        | 1.000 |     |                             |                 |                                               |
| 10    | P        | 1.000 |     |                             |                 |                                               |
| 11    | E        | 0.888 |     |                             |                 |                                               |
| 12    | V        | 0.904 |     |                             |                 |                                               |
| 13    | L        | 0.654 |     | V                           | 0.22            | human MR + 9 others                           |
| 14    | Y        | 1.000 |     |                             |                 |                                               |
| 15    | A        | 0.964 |     |                             |                 |                                               |
| 16    | G        | 1.000 |     |                             |                 |                                               |
| 17    | Y        | 1.000 |     |                             |                 |                                               |
| 18    | D        | 1.000 |     |                             |                 |                                               |
| 19    | S        | 0.876 |     |                             |                 |                                               |
| 20    | S        | 0.754 |     | T                           | 0.23            | trout MR and xenopus MR                       |
| 21    | L        | 0.969 |     |                             |                 |                                               |
| 22    | P        | 1.000 |     |                             |                 |                                               |
| 23    | D        | 0.999 |     |                             |                 |                                               |
| 24    | T        | 1.000 |     |                             |                 |                                               |
| 25    | T        | 0.538 |     | S                           | 0.32            | None                                          |
| 26    | N        | 0.930 |     |                             |                 |                                               |
| 27    | R        | 0.878 |     |                             |                 |                                               |
| 28    | L        | 1.000 |     |                             |                 |                                               |
| 29    | L        | 0.969 | *   |                             |                 |                                               |
| 30    | S        | 0.983 |     |                             |                 |                                               |
| 31    | S        | 0.849 |     |                             |                 |                                               |
| 32    | L        | 1.000 | *   |                             |                 |                                               |
| 33    | N        | 1.000 | *   |                             |                 |                                               |
| 34    | R        | 0.908 |     |                             |                 |                                               |

| Site# | ML state | PP    | LBP | Alternate state (if PP>0.2) | PP of alt state | Aldo-activated receptors with alternate state |
|-------|----------|-------|-----|-----------------------------|-----------------|-----------------------------------------------|
| 35    | L        | 1.000 | *   |                             |                 |                                               |
| 36    | G        | 0.980 | *   |                             |                 |                                               |
| 37    | G        | 0.994 |     |                             |                 |                                               |
| 38    | R        | 0.716 |     |                             |                 |                                               |
| 39    | Q        | 1.000 | *   |                             |                 |                                               |
| 40    | M        | 0.990 |     |                             |                 |                                               |
| 41    | V        | 0.823 |     |                             |                 |                                               |
| 42    | S        | 0.899 |     |                             |                 |                                               |
| 43    | V        | 0.976 |     |                             |                 |                                               |
| 44    | V        | 1.000 |     |                             |                 |                                               |
| 45    | K        | 1.000 |     |                             |                 |                                               |
| 46    | W        | 1.000 |     |                             |                 |                                               |
| 47    | A        | 1.000 |     |                             |                 |                                               |
| 48    | K        | 1.000 |     |                             |                 |                                               |
| 49    | A        | 0.839 |     |                             |                 |                                               |
| 50    | L        | 0.997 |     |                             |                 |                                               |
| 51    | P        | 1.000 |     |                             |                 |                                               |
| 52    | G        | 1.000 |     |                             |                 |                                               |
| 53    | F        | 1.000 |     |                             |                 |                                               |
| 54    | R        | 1.000 |     |                             |                 |                                               |
| 55    | N        | 0.956 |     |                             |                 |                                               |
| 56    | L        | 1.000 |     |                             |                 |                                               |
| 57    | H        | 1.000 |     |                             |                 |                                               |
| 58    | L        | 0.999 |     |                             |                 |                                               |
| 59    | D        | 1.000 |     |                             |                 |                                               |
| 60    | D        | 1.000 |     |                             |                 |                                               |
| 61    | Q        | 1.000 |     |                             |                 |                                               |
| 62    | M        | 1.000 |     |                             |                 |                                               |
| 63    | T        | 0.987 |     |                             |                 |                                               |
| 64    | L        | 1.000 |     |                             |                 |                                               |
| 65    | L        | 0.981 |     |                             |                 |                                               |
| 66    | Q        | 1.000 |     |                             |                 |                                               |
| 67    | Y        | 0.999 |     |                             |                 |                                               |
| 68    | S        | 1.000 |     |                             |                 |                                               |
| 69    | W        | 1.000 | *   |                             |                 |                                               |
| 70    | M        | 1.000 | *   |                             |                 |                                               |
| 71    | S        | 0.455 |     | C                           | 0.38            | human MR + 9 others                           |
| 72    | L        | 1.000 |     |                             |                 |                                               |
| 73    | M        | 1.000 | *   |                             |                 |                                               |
| 74    | A        | 0.723 | *   |                             |                 |                                               |
| 75    | F        | 1.000 |     |                             |                 |                                               |
| 76    | S        | 0.813 |     |                             |                 |                                               |
| 77    | L        | 0.998 | *   |                             |                 |                                               |
| 78    | G        | 0.864 |     |                             |                 |                                               |
| 79    | W        | 1.000 |     |                             |                 |                                               |
| 80    | R        | 1.000 | *   |                             |                 |                                               |

| Site# | ML state | PP    | LBP | Alternate state (if PP>0.2) | PP of alt state | Aldo-activated receptors with alternate state |
|-------|----------|-------|-----|-----------------------------|-----------------|-----------------------------------------------|
| 81    | S        | 1.000 |     |                             |                 |                                               |
| 82    | Y        | 1.000 |     |                             |                 |                                               |
| 83    | K        | 0.980 |     |                             |                 |                                               |
| 84    | H        | 0.980 |     |                             |                 |                                               |
| 85    | S        | 0.660 |     | T                           | 0.32            | human MR + 8others                            |
| 86    | N        | 1.000 |     |                             |                 |                                               |
| 87    | G        | 0.971 |     |                             |                 |                                               |
| 88    | N        | 0.503 |     | S                           | 0.28            | skate GR                                      |
| 89    | M        | 1.000 |     |                             |                 |                                               |
| 90    | L        | 1.000 |     |                             |                 |                                               |
| 91    | Y        | 0.794 |     |                             |                 |                                               |
| 92    | F        | 1.000 | *   |                             |                 |                                               |
| 93    | A        | 1.000 |     |                             |                 |                                               |
| 94    | P        | 1.000 |     |                             |                 |                                               |
| 95    | D        | 1.000 |     |                             |                 |                                               |
| 96    | L        | 1.000 |     |                             |                 |                                               |
| 97    | I        | 0.889 |     |                             |                 |                                               |
| 98    | F        | 0.997 |     |                             |                 |                                               |
| 99    | N        | 1.000 |     |                             |                 |                                               |
| 100   | E        | 1.000 |     |                             |                 |                                               |
| 101   | E        | 0.885 |     |                             |                 |                                               |
| 102   | R        | 1.000 |     |                             |                 |                                               |
| 103   | M        | 1.000 |     |                             |                 |                                               |
| 104   | Q        | 0.968 |     |                             |                 |                                               |
| 105   | Q        | 0.974 |     |                             |                 |                                               |
| 106   | S        | 0.992 |     |                             |                 |                                               |
| 107   | A        | 0.484 |     | T                           | 0.36            | skate GR                                      |
| 108   | M        | 1.000 | *   |                             |                 |                                               |
| 109   | Y        | 0.998 |     |                             |                 |                                               |
| 110   | D        | 0.881 |     |                             |                 |                                               |
| 111   | L        | 0.992 | *   |                             |                 |                                               |
| 112   | C        | 1.000 |     |                             |                 |                                               |
| 113   | Q        | 0.578 |     | K                           | 0.33            | skate GR                                      |
| 114   | G        | 0.968 |     |                             |                 |                                               |
| 115   | M        | 1.000 | *   |                             |                 |                                               |
| 116   | R        | 0.406 |     | Q                           | 0.27            | xenopus MR and skate MR                       |
| 117   | K        | 0.486 |     | Q                           | 0.32            | human MR + 7others                            |
| 118   | I        | 0.994 |     |                             |                 |                                               |
| 119   | S        | 0.963 |     |                             |                 |                                               |
| 120   | V        | 0.278 |     | S                           | 0.21            | None                                          |
| 121   | E        | 0.954 |     |                             |                 |                                               |
| 122   | F        | 1.000 |     |                             |                 |                                               |
| 123   | V        | 0.741 |     |                             |                 |                                               |
| 124   | R        | 0.924 |     |                             |                 |                                               |
| 125   | L        | 1.000 |     |                             |                 |                                               |
| 126   | Q        | 0.993 |     |                             |                 |                                               |

| Site# | ML state | PP    | LBP | Alternate state (if PP>0.2) | PP of alt state | Aldo-activated receptors with alternate state |
|-------|----------|-------|-----|-----------------------------|-----------------|-----------------------------------------------|
| 127   | V        | 0.988 |     |                             |                 |                                               |
| 128   | T        | 0.470 |     | S                           | 0.31            | hagfish CR                                    |
| 129   | Y        | 0.946 |     |                             |                 |                                               |
| 130   | E        | 0.922 |     |                             |                 |                                               |
| 131   | E        | 1.000 |     |                             |                 |                                               |
| 132   | Y        | 0.976 |     |                             |                 |                                               |
| 133   | L        | 1.000 |     |                             |                 |                                               |
| 134   | C        | 1.000 |     |                             |                 |                                               |
| 135   | M        | 1.000 |     |                             |                 |                                               |
| 136   | K        | 1.000 |     |                             |                 |                                               |
| 137   | V        | 0.741 |     | A                           | 0.26            | skate GR                                      |
| 138   | L        | 1.000 |     |                             |                 |                                               |
| 139   | L        | 1.000 |     |                             |                 |                                               |
| 140   | L        | 1.000 |     |                             |                 |                                               |
| 141   | L        | 1.000 |     |                             |                 |                                               |
| 142   | S        | 0.983 |     |                             |                 |                                               |
| 143   | T        | 1.000 |     |                             |                 |                                               |
| 144   | V        | 0.755 |     | I                           | 0.25            | tree shrew MR, sheep MR and skate GR          |
| 145   | P        | 1.000 |     |                             |                 |                                               |
| 146   | K        | 0.986 |     |                             |                 |                                               |
| 147   | D        | 0.938 |     |                             |                 |                                               |
| 148   | G        | 1.000 |     |                             |                 |                                               |
| 149   | L        | 1.000 |     |                             |                 |                                               |
| 150   | K        | 1.000 |     |                             |                 |                                               |
| 151   | S        | 0.999 |     |                             |                 |                                               |
| 152   | Q        | 1.000 |     |                             |                 |                                               |
| 153   | A        | 0.986 |     |                             |                 |                                               |
| 154   | T        | 0.370 |     | A                           | 0.23            | human MR +7tohers                             |
| 155   | F        | 1.000 |     |                             |                 |                                               |
| 156   | D        | 0.995 |     |                             |                 |                                               |
| 157   | E        | 1.000 |     |                             |                 |                                               |
| 158   | I        | 0.962 |     |                             |                 |                                               |
| 159   | R        | 1.000 |     |                             |                 |                                               |
| 160   | M        | 0.975 |     |                             |                 |                                               |
| 161   | S        | 0.506 |     | N                           | 0.31            | human MR + 9others                            |
| 162   | Y        | 1.000 |     |                             |                 |                                               |
| 163   | I        | 1.000 |     |                             |                 |                                               |
| 164   | K        | 0.997 |     |                             |                 |                                               |
| 165   | E        | 1.000 |     |                             |                 |                                               |
| 166   | L        | 1.000 |     |                             |                 |                                               |
| 167   | G        | 0.967 |     |                             |                 |                                               |
| 168   | K        | 0.946 |     |                             |                 |                                               |
| 169   | A        | 0.972 |     |                             |                 |                                               |
| 170   | I        | 0.993 |     |                             |                 |                                               |
| 171   | V        | 0.869 |     |                             |                 |                                               |
| 172   | K        | 0.961 |     |                             |                 |                                               |

| Site# | ML state | PP    | LBP | Alternate state (if PP>0.2) | PP of alt state | Aldo-activated receptors with alternate state  |
|-------|----------|-------|-----|-----------------------------|-----------------|------------------------------------------------|
| 173   | K        | 0.566 |     | R                           | 0.41            | None                                           |
| 174   | E        | 0.986 |     |                             |                 |                                                |
| 175   | G        | 0.742 |     |                             |                 |                                                |
| 176   | N        | 1.000 |     |                             |                 |                                                |
| 177   | S        | 0.981 |     |                             |                 |                                                |
| 178   | S        | 0.903 |     |                             |                 |                                                |
| 179   | Q        | 1.000 |     |                             |                 |                                                |
| 180   | N        | 0.959 |     |                             |                 |                                                |
| 181   | W        | 1.000 |     |                             |                 |                                                |
| 182   | Q        | 0.979 |     |                             |                 |                                                |
| 183   | R        | 1.000 |     |                             |                 |                                                |
| 184   | F        | 1.000 |     |                             |                 |                                                |
| 185   | Y        | 1.000 |     |                             |                 |                                                |
| 186   | Q        | 1.000 |     |                             |                 |                                                |
| 187   | L        | 1.000 |     |                             |                 |                                                |
| 188   | T        | 1.000 |     |                             |                 |                                                |
| 189   | K        | 1.000 |     |                             |                 |                                                |
| 190   | L        | 1.000 |     |                             |                 |                                                |
| 191   | L        | 1.000 |     |                             |                 |                                                |
| 192   | D        | 1.000 |     |                             |                 |                                                |
| 193   | S        | 1.000 |     |                             |                 |                                                |
| 194   | M        | 1.000 |     |                             |                 |                                                |
| 195   | H        | 1.000 |     |                             |                 |                                                |
| 196   | D        | 0.838 |     |                             |                 |                                                |
| 197   | L        | 0.944 |     |                             |                 |                                                |
| 198   | V        | 1.000 |     |                             |                 |                                                |
| 199   | G        | 0.692 |     | E                           | 0.28            | trout MR and skate GR                          |
| 200   | G        | 0.972 |     |                             |                 |                                                |
| 201   | L        | 1.000 | *   |                             |                 |                                                |
| 202   | L        | 1.000 |     |                             |                 |                                                |
| 203   | Q        | 0.964 |     |                             |                 |                                                |
| 204   | F        | 1.000 | *   |                             |                 |                                                |
| 205   | C        | 1.000 | *   |                             |                 |                                                |
| 206   | F        | 1.000 |     |                             |                 |                                                |
| 207   | Y        | 0.995 |     |                             |                 |                                                |
| 208   | T        | 1.000 | *   |                             |                 |                                                |
| 209   | F        | 1.000 |     |                             |                 |                                                |
| 210   | V        | 0.795 |     |                             |                 |                                                |
| 211   | Q        | 0.819 |     |                             |                 |                                                |
| 212   | S        | 0.995 |     |                             |                 |                                                |
| 213   | K        | 0.948 |     |                             |                 |                                                |
| 214   | T        | 0.419 |     | A / S                       | 0.36 / 0.22     | A in human MR + 9other, S not present in aldo+ |
| 215   | L        | 0.997 |     |                             |                 |                                                |
| 216   | S        | 0.993 |     |                             |                 |                                                |
| 217   | V        | 0.997 | *   |                             |                 |                                                |
| 218   | E        | 0.999 |     |                             |                 |                                                |

| Site# | ML state | PP     | LBP | Alternate state (if PP>0.2) | PP of alt state | Aldo-activated receptors with alternate state |
|-------|----------|--------|-----|-----------------------------|-----------------|-----------------------------------------------|
| 219   | F        | 1.000  | *   |                             |                 |                                               |
| 220   | P        | 1.000  |     |                             |                 |                                               |
| 221   | E        | 0.999  |     |                             |                 |                                               |
| 222   | M        | 1.000  |     |                             |                 |                                               |
| 223   | L        | 0.999  | *   |                             |                 |                                               |
| 224   | V        | 0.678  |     | A                           | 0.31            | human MR + 9others                            |
| 225   | E        | 1.000  |     |                             |                 |                                               |
| 226   | I        | 1.000  |     |                             |                 |                                               |
| 227   | I        | 1.000  |     |                             |                 |                                               |
| 228   | S        | 0.998  |     |                             |                 |                                               |
| 229   | N        | 0.962  |     |                             |                 |                                               |
| 230   | Q        | 1.000  |     |                             |                 |                                               |
| 231   | L        | 0.999  |     |                             |                 |                                               |
| 232   | P        | 1.000  |     |                             |                 |                                               |
| 233   | K        | 0.999  |     |                             |                 |                                               |
| 234   | V        | 0.903  |     |                             |                 |                                               |
| 235   | M        | 0.469  |     | T                           | 0.21            | skate MR                                      |
| 236   | A        | 0.905  |     |                             |                 |                                               |
| 237   | G        | 1.000  |     |                             |                 |                                               |
| 238   | M        | 0.897  |     |                             |                 |                                               |
| 239   | A        | 0.900  |     |                             |                 |                                               |
| 240   | K        | 1.000  |     |                             |                 |                                               |
| 241   | P        | 0.965  |     |                             |                 |                                               |
| 242   | L        | 1.000  |     |                             |                 |                                               |
| 243   | L        | 0.980  |     |                             |                 |                                               |
| 244   | F        | 1.000  |     |                             |                 |                                               |
| 245   | H        | 1.000  |     |                             |                 |                                               |
| 246   | Q        | 0.618  |     |                             |                 |                                               |
| 247   | K        | 0.999  |     |                             |                 |                                               |
|       | mean     | 0.9303 |     |                             |                 |                                               |

**Table S3.** Maximum likelihood reconstruction and posterior probabilities of AncGR2. Columns show residue position (numbered as in AncCR), maximum likelihood state and posterior probability (PP). LBP: \* residues in the ligand binding pocket that contact hormone. Alternate state lists plausible amino acids other than the ML reconstruction, if any, with posterior probability > 0.2. Seventh column shows extant aldosterone-insensitive receptors, if any that contain the alternate state. Penultimate column shows extant aldosterone-activated receptors, if any, that contain the alternate states. Final column shows whether the ML state is present in any aldosterone-activated receptors. AncGR2 has genbank accession EF631976.

| Site# | ML state | PP    | LBP | Alter-nate state (PP> 0.2) | PP of alt state | Aldo-insensitive receptors with alternate state             | Aldo-activated receptors with alternate state | ML state in aldo-activated receptors? |
|-------|----------|-------|-----|----------------------------|-----------------|-------------------------------------------------------------|-----------------------------------------------|---------------------------------------|
| -2    | P        | 1.000 |     |                            |                 |                                                             |                                               |                                       |
| -1    | T        | 0.968 |     |                            |                 |                                                             |                                               |                                       |
| 1     | L        | 0.692 |     | M                          | 0.28            | trout GR, haplochromis GRalph, and halibut GR               | 0                                             | yes                                   |
| 2     | I        | 0.457 |     | V                          | 0.36            | human GR +7 others                                          | Human MR, tree shrew MR                       | yes                                   |
| 3     | S        | 1.000 |     |                            |                 |                                                             |                                               |                                       |
| 4     | L        | 0.977 |     |                            |                 |                                                             |                                               |                                       |
| 5     | L        | 1.000 |     |                            |                 |                                                             |                                               |                                       |
| 6     | E        | 0.968 |     |                            |                 |                                                             |                                               |                                       |
| 7     | V        | 0.535 |     | A                          | 0.41            | trout GR, haplochromis GRalph, and halibut GR               | 0                                             | no                                    |
| 8     | I        | 1.000 |     |                            |                 |                                                             |                                               |                                       |
| 9     | E        | 1.000 |     |                            |                 |                                                             |                                               |                                       |
| 10    | P        | 1.000 |     |                            |                 |                                                             |                                               |                                       |
| 11    | E        | 0.931 |     |                            |                 |                                                             |                                               |                                       |
| 12    | V        | 0.891 |     |                            |                 |                                                             |                                               |                                       |
| 13    | L        | 0.659 |     | I                          | 0.28            | trout GR, haplochromis GRalph, and halibut GR               | 0                                             | yes                                   |
| 14    | Y        | 1.000 |     |                            |                 |                                                             |                                               |                                       |
| 15    | S        | 0.973 |     |                            |                 |                                                             |                                               |                                       |
| 16    | G        | 1.000 |     |                            |                 |                                                             |                                               |                                       |
| 17    | Y        | 1.000 |     |                            |                 |                                                             |                                               |                                       |
| 18    | D        | 1.000 |     |                            |                 |                                                             |                                               |                                       |
| 19    | S        | 0.993 |     |                            |                 |                                                             |                                               |                                       |
| 20    | T        | 0.518 |     | S                          | 0.47            | sq monkey GR, trout GR, haplochromis GRalph, and halibut GR | lampreyCR troutMR and xenopus MR              | yes                                   |
| 21    | L        | 0.992 |     |                            |                 |                                                             |                                               |                                       |
| 22    | P        | 1.000 |     |                            |                 |                                                             |                                               |                                       |

| Site# | ML state | PP    | LBP | Alter-nate state (PP> 0.2) | PP of alt state | Aldo-insensitive receptors with alternate state | Aldo-activated receptors with alternate state | ML state in aldo-activated receptors? |
|-------|----------|-------|-----|----------------------------|-----------------|-------------------------------------------------|-----------------------------------------------|---------------------------------------|
| 23    | D        | 1.000 |     |                            |                 |                                                 |                                               |                                       |
| 24    | T        | 0.999 |     |                            |                 |                                                 |                                               |                                       |
| 25    | S        | 0.613 |     | T                          | 0.36            | human GR +5others                               | 5 MRs                                         | no                                    |
| 26    | T        | 0.500 |     |                            |                 |                                                 |                                               |                                       |
| 27    | R        | 0.995 |     |                            |                 |                                                 |                                               |                                       |
| 28    | L        | 0.999 |     |                            |                 |                                                 |                                               |                                       |
| 29    | M        | 0.994 | *   |                            |                 |                                                 |                                               |                                       |
| 30    | S        | 0.853 |     |                            |                 |                                                 |                                               |                                       |
| 31    | T        | 0.872 |     |                            |                 |                                                 |                                               |                                       |
| 32    | L        | 1.000 | *   |                            |                 |                                                 |                                               |                                       |
| 33    | N        | 1.000 | *   |                            |                 |                                                 |                                               |                                       |
| 34    | R        | 0.934 |     |                            |                 |                                                 |                                               |                                       |
| 35    | L        | 1.000 | *   |                            |                 |                                                 |                                               |                                       |
| 36    | G        | 1.000 | *   |                            |                 |                                                 |                                               |                                       |
| 37    | G        | 1.000 |     |                            |                 |                                                 |                                               |                                       |
| 38    | R        | 0.985 |     |                            |                 |                                                 |                                               |                                       |
| 39    | Q        | 1.000 | *   |                            |                 |                                                 |                                               |                                       |
| 40    | V        | 0.993 |     |                            |                 |                                                 |                                               |                                       |
| 41    | V        | 0.902 |     |                            |                 |                                                 |                                               |                                       |
| 42    | S        | 0.948 |     |                            |                 |                                                 |                                               |                                       |
| 43    | A        | 0.990 |     |                            |                 |                                                 |                                               |                                       |
| 44    | V        | 1.000 |     |                            |                 |                                                 |                                               |                                       |
| 45    | K        | 1.000 |     |                            |                 |                                                 |                                               |                                       |
| 46    | W        | 1.000 |     |                            |                 |                                                 |                                               |                                       |
| 47    | A        | 1.000 |     |                            |                 |                                                 |                                               |                                       |
| 48    | K        | 1.000 |     |                            |                 |                                                 |                                               |                                       |
| 49    | A        | 0.975 |     |                            |                 |                                                 |                                               |                                       |
| 50    | L        | 0.956 |     |                            |                 |                                                 |                                               |                                       |
| 51    | P        | 1.000 |     |                            |                 |                                                 |                                               |                                       |
| 52    | G        | 1.000 |     |                            |                 |                                                 |                                               |                                       |
| 53    | F        | 1.000 |     |                            |                 |                                                 |                                               |                                       |
| 54    | R        | 1.000 |     |                            |                 |                                                 |                                               |                                       |
| 55    | N        | 0.999 |     |                            |                 |                                                 |                                               |                                       |
| 56    | L        | 1.000 |     |                            |                 |                                                 |                                               |                                       |
| 57    | H        | 1.000 |     |                            |                 |                                                 |                                               |                                       |
| 58    | L        | 1.000 |     |                            |                 |                                                 |                                               |                                       |
| 59    | D        | 1.000 |     |                            |                 |                                                 |                                               |                                       |
| 60    | D        | 1.000 |     |                            |                 |                                                 |                                               |                                       |
| 61    | Q        | 1.000 |     |                            |                 |                                                 |                                               |                                       |



| Site# | ML state | PP    | LBP | Alter-nate state (PP> 0.2) | PP of alt state | Aldo-insensitive receptors with alternate state | Aldo-activated receptors with alternate state | ML state in aldo-activated receptors? |
|-------|----------|-------|-----|----------------------------|-----------------|-------------------------------------------------|-----------------------------------------------|---------------------------------------|
| 62    | M        | 1.000 |     |                            |                 |                                                 |                                               |                                       |
| 63    | T        | 1.000 |     |                            |                 |                                                 |                                               |                                       |
| 64    | L        | 1.000 |     |                            |                 |                                                 |                                               |                                       |
| 65    | L        | 1.000 |     |                            |                 |                                                 |                                               |                                       |
| 66    | Q        | 1.000 |     |                            |                 |                                                 |                                               |                                       |
| 67    | Y        | 0.979 |     |                            |                 |                                                 |                                               |                                       |
| 68    | S        | 1.000 |     |                            |                 |                                                 |                                               |                                       |
| 69    | W        | 1.000 | *   |                            |                 |                                                 |                                               |                                       |
| 70    | M        | 0.996 | *   |                            |                 |                                                 |                                               |                                       |
| 71    | F        | 0.995 |     |                            |                 |                                                 |                                               |                                       |
| 72    | L        | 1.000 |     |                            |                 |                                                 |                                               |                                       |
| 73    | M        | 1.000 | *   |                            |                 |                                                 |                                               |                                       |
| 74    | A        | 0.711 | *   | S                          | 0.23            | trout GR, haplochromis GRalph, and halibut GR   | human MR + 9others                            | yes                                   |
| 75    | F        | 1.000 |     |                            |                 |                                                 |                                               |                                       |
| 76    | S        | 0.731 |     | A                          | 0.23            | human GR +8others                               | human MR + 6others                            | yes                                   |
| 77    | L        | 1.000 | *   |                            |                 |                                                 |                                               |                                       |
| 78    | G        | 0.999 |     |                            |                 |                                                 |                                               |                                       |
| 79    | W        | 1.000 |     |                            |                 |                                                 |                                               |                                       |
| 80    | R        | 1.000 | *   |                            |                 |                                                 |                                               |                                       |
| 81    | S        | 1.000 |     |                            |                 |                                                 |                                               |                                       |
| 82    | Y        | 1.000 |     |                            |                 |                                                 |                                               |                                       |
| 83    | K        | 0.765 |     |                            |                 |                                                 |                                               |                                       |
| 84    | Q        | 0.987 |     |                            |                 |                                                 |                                               |                                       |
| 85    | S        | 0.692 |     | T                          | 0.24            | xenopus GR                                      | human MR + 8others, node 69 is S              | yes                                   |
| 86    | N        | 0.999 |     |                            |                 |                                                 |                                               |                                       |
| 87    | G        | 0.999 |     |                            |                 |                                                 |                                               |                                       |
| 88    | N        | 0.928 |     |                            |                 |                                                 |                                               |                                       |
| 89    | M        | 0.991 |     |                            |                 |                                                 |                                               |                                       |
| 90    | L        | 1.000 |     |                            |                 |                                                 |                                               |                                       |
| 91    | C        | 0.833 |     |                            |                 |                                                 |                                               |                                       |
| 92    | F        | 1.000 | *   |                            |                 |                                                 |                                               |                                       |
| 93    | A        | 1.000 |     |                            |                 |                                                 |                                               |                                       |
| 94    | P        | 1.000 |     |                            |                 |                                                 |                                               |                                       |
| 95    | D        | 1.000 |     |                            |                 |                                                 |                                               |                                       |

| Site# | ML state | PP    | LBP | Alter-nate state (PP> 0.2) | PP of alt state | Aldo-insensitive receptors with alternate state | Aldo-activated receptors with alternate state | ML state in aldo-activated receptors? |
|-------|----------|-------|-----|----------------------------|-----------------|-------------------------------------------------|-----------------------------------------------|---------------------------------------|
| 96    | L        | 1.000 |     |                            |                 |                                                 |                                               |                                       |
| 97    | V        | 0.603 |     | I                          | 0.37            | human GR +5others                               | haplochromis MR and xenopus MR                | yes                                   |
| 98    | I        | 0.998 |     |                            |                 |                                                 |                                               |                                       |
| 99    | N        | 1.000 |     |                            |                 |                                                 |                                               |                                       |
| 100   | E        | 0.999 |     |                            |                 |                                                 |                                               |                                       |
| 101   | E        | 0.909 |     |                            |                 |                                                 |                                               |                                       |
| 102   | R        | 1.000 |     |                            |                 |                                                 |                                               |                                       |
| 103   | M        | 1.000 |     |                            |                 |                                                 |                                               |                                       |
| 104   | Q        | 0.498 |     | K                          | 0.33            | trout GR, haplochromis GRalph, and halibut GR   | 0                                             | yes                                   |
| 105   | L        | 0.989 |     |                            |                 |                                                 |                                               |                                       |
| 106   | P        | 0.998 |     |                            |                 |                                                 |                                               |                                       |
| 107   | Y        | 0.659 |     |                            |                 |                                                 |                                               |                                       |
| 108   | M        | 1.000 | *   |                            |                 |                                                 |                                               |                                       |
| 109   | Y        | 0.938 |     |                            |                 |                                                 |                                               |                                       |
| 110   | D        | 0.965 |     |                            |                 |                                                 |                                               |                                       |
| 111   | Q        | 0.994 | *   |                            |                 |                                                 |                                               |                                       |
| 112   | C        | 1.000 |     |                            |                 |                                                 |                                               |                                       |
| 113   | Q        | 0.496 |     | K                          | 0.29            | human GR +6others                               | 0                                             | yes                                   |
| 114   | Q        | 0.766 |     |                            |                 |                                                 |                                               |                                       |
| 115   | M        | 1.000 | *   |                            |                 |                                                 |                                               |                                       |
| 116   | L        | 0.988 |     |                            |                 |                                                 |                                               |                                       |
| 117   | K        | 0.927 |     |                            |                 |                                                 |                                               |                                       |
| 118   | I        | 0.988 |     |                            |                 |                                                 |                                               |                                       |
| 119   | S        | 0.986 |     |                            |                 |                                                 |                                               |                                       |
| 120   | S        | 0.926 |     |                            |                 |                                                 |                                               |                                       |
| 121   | E        | 0.998 |     |                            |                 |                                                 |                                               |                                       |
| 122   | F        | 0.990 |     |                            |                 |                                                 |                                               |                                       |
| 123   | V        | 0.782 |     |                            |                 |                                                 |                                               |                                       |
| 124   | R        | 0.990 |     |                            |                 |                                                 |                                               |                                       |
| 125   | L        | 1.000 |     |                            |                 |                                                 |                                               |                                       |
| 126   | Q        | 1.000 |     |                            |                 |                                                 |                                               |                                       |
| 127   | V        | 0.990 |     |                            |                 |                                                 |                                               |                                       |
| 128   | S        | 0.979 |     |                            |                 |                                                 |                                               |                                       |
| 129   | Y        | 0.970 |     |                            |                 |                                                 |                                               |                                       |
| 130   | D        | 0.656 |     | E                          | 0.34            | human GR +8others                               | human MR + 6others                            | yes                                   |

| Site# | ML state | PP    | LBP | Alter-nate state (PP> 0.2) | PP of alt state | Aldo-insensitive receptors with alternate state | Aldo-activated receptors with alternate state | ML state in aldo-activated receptors? |
|-------|----------|-------|-----|----------------------------|-----------------|-------------------------------------------------|-----------------------------------------------|---------------------------------------|
| 131   | E        | 1.000 |     |                            |                 |                                                 |                                               |                                       |
| 132   | Y        | 1.000 |     |                            |                 |                                                 |                                               |                                       |
| 133   | L        | 1.000 |     |                            |                 |                                                 |                                               |                                       |
| 134   | C        | 1.000 |     |                            |                 |                                                 |                                               |                                       |
| 135   | M        | 1.000 |     |                            |                 |                                                 |                                               |                                       |
| 136   | K        | 1.000 |     |                            |                 |                                                 |                                               |                                       |
| 137   | V        | 0.971 |     |                            |                 |                                                 |                                               |                                       |
| 138   | L        | 1.000 |     |                            |                 |                                                 |                                               |                                       |
| 139   | L        | 1.000 |     |                            |                 |                                                 |                                               |                                       |
| 140   | L        | 1.000 |     |                            |                 |                                                 |                                               |                                       |
| 141   | L        | 0.999 |     |                            |                 |                                                 |                                               |                                       |
| 142   | S        | 0.999 |     |                            |                 |                                                 |                                               |                                       |
| 143   | T        | 1.000 |     |                            |                 |                                                 |                                               |                                       |
| 144   | V        | 0.910 |     |                            |                 |                                                 |                                               |                                       |
| 145   | P        | 1.000 |     |                            |                 |                                                 |                                               |                                       |
| 146   | K        | 1.000 |     |                            |                 |                                                 |                                               |                                       |
| 147   | D        | 0.922 |     |                            |                 |                                                 |                                               |                                       |
| 148   | G        | 1.000 |     |                            |                 |                                                 |                                               |                                       |
| 149   | L        | 1.000 |     |                            |                 |                                                 |                                               |                                       |
| 150   | K        | 1.000 |     |                            |                 |                                                 |                                               |                                       |
| 151   | S        | 1.000 |     |                            |                 |                                                 |                                               |                                       |
| 152   | Q        | 1.000 |     |                            |                 |                                                 |                                               |                                       |
| 153   | A        | 0.993 |     |                            |                 |                                                 |                                               |                                       |
| 154   | V        | 0.611 |     | L                          | 0.20            | human GR + 8others                              | 0                                             | yes                                   |
| 155   | F        | 1.000 |     |                            |                 |                                                 |                                               |                                       |
| 156   | D        | 0.997 |     |                            |                 |                                                 |                                               |                                       |
| 157   | E        | 1.000 |     |                            |                 |                                                 |                                               |                                       |
| 158   | I        | 1.000 |     |                            |                 |                                                 |                                               |                                       |
| 159   | R        | 1.000 |     |                            |                 |                                                 |                                               |                                       |
| 160   | M        | 0.999 |     |                            |                 |                                                 |                                               |                                       |
| 161   | T        | 0.733 |     | S                          | 0.25            | 0                                               | skate GR and lamprey CR                       | hagfish CR                            |
| 162   | Y        | 1.000 |     |                            |                 |                                                 |                                               |                                       |
| 163   | I        | 1.000 |     |                            |                 |                                                 |                                               |                                       |
| 164   | K        | 1.000 |     |                            |                 |                                                 |                                               |                                       |
| 165   | E        | 1.000 |     |                            |                 |                                                 |                                               |                                       |
| 166   | L        | 1.000 |     |                            |                 |                                                 |                                               |                                       |
| 167   | G        | 1.000 |     |                            |                 |                                                 |                                               |                                       |

| Site# | ML state | PP    | LBP | Alter-nate state (PP> 0.2) | PP of alt state | Aldo-insensitive receptors with alternate state | Aldo-activated receptors with alternate state | ML state in aldo-activated receptors? |
|-------|----------|-------|-----|----------------------------|-----------------|-------------------------------------------------|-----------------------------------------------|---------------------------------------|
| 168   | K        | 0.999 |     |                            |                 |                                                 |                                               |                                       |
| 169   | A        | 0.999 |     |                            |                 |                                                 |                                               |                                       |
| 170   | I        | 0.999 |     |                            |                 |                                                 |                                               |                                       |
| 171   | V        | 0.986 |     |                            |                 |                                                 |                                               |                                       |
| 172   | K        | 0.996 |     |                            |                 |                                                 |                                               |                                       |
| 173   | R        | 0.964 |     |                            |                 |                                                 |                                               |                                       |
| 174   | E        | 0.996 |     |                            |                 |                                                 |                                               |                                       |
| 175   | G        | 0.758 |     |                            |                 |                                                 |                                               |                                       |
| 176   | N        | 1.000 |     |                            |                 |                                                 |                                               |                                       |
| 177   | S        | 0.998 |     |                            |                 |                                                 |                                               |                                       |
| 178   | S        | 0.992 |     |                            |                 |                                                 |                                               |                                       |
| 179   | Q        | 1.000 |     |                            |                 |                                                 |                                               |                                       |
| 180   | N        | 0.998 |     |                            |                 |                                                 |                                               |                                       |
| 181   | W        | 1.000 |     |                            |                 |                                                 |                                               |                                       |
| 182   | Q        | 1.000 |     |                            |                 |                                                 |                                               |                                       |
| 183   | R        | 1.000 |     |                            |                 |                                                 |                                               |                                       |
| 184   | F        | 1.000 |     |                            |                 |                                                 |                                               |                                       |
| 185   | Y        | 1.000 |     |                            |                 |                                                 |                                               |                                       |
| 186   | Q        | 1.000 |     |                            |                 |                                                 |                                               |                                       |
| 187   | L        | 1.000 |     |                            |                 |                                                 |                                               |                                       |
| 188   | T        | 1.000 |     |                            |                 |                                                 |                                               |                                       |
| 189   | K        | 1.000 |     |                            |                 |                                                 |                                               |                                       |
| 190   | L        | 1.000 |     |                            |                 |                                                 |                                               |                                       |
| 191   | L        | 1.000 |     |                            |                 |                                                 |                                               |                                       |
| 192   | D        | 1.000 |     |                            |                 |                                                 |                                               |                                       |
| 193   | S        | 1.000 |     |                            |                 |                                                 |                                               |                                       |
| 194   | M        | 1.000 |     |                            |                 |                                                 |                                               |                                       |
| 195   | H        | 1.000 |     |                            |                 |                                                 |                                               |                                       |
| 196   | E        | 0.956 |     |                            |                 |                                                 |                                               |                                       |
| 197   | M        | 0.577 |     | V                          | 0.20            | human GR + 8others                              | 0                                             | no                                    |
| 198   | V        | 1.000 |     |                            |                 |                                                 |                                               |                                       |
| 199   | G        | 0.686 |     | E                          | 0.29            | human GR + 10others                             | 0                                             | yes                                   |
| 200   | G        | 0.947 |     |                            |                 |                                                 |                                               |                                       |
| 201   | L        | 1.000 | *   |                            |                 |                                                 |                                               |                                       |
| 202   | L        | 1.000 |     |                            |                 |                                                 |                                               |                                       |
| 203   | Q        | 0.909 |     |                            |                 |                                                 |                                               |                                       |
| 204   | F        | 0.997 | *   |                            |                 |                                                 |                                               |                                       |
| 205   | C        | 1.000 | *   |                            |                 |                                                 |                                               |                                       |
| 206   | F        | 1.000 |     |                            |                 |                                                 |                                               |                                       |

| Site# | ML state | PP    | LBP | Alter-nate state (PP> 0.2) | PP of alt state | Aldo-insensitive receptors with alternate state | Aldo-activated receptors with alternate state | ML state in aldo-activated receptors? |
|-------|----------|-------|-----|----------------------------|-----------------|-------------------------------------------------|-----------------------------------------------|---------------------------------------|
| 207   | Y        | 0.983 |     |                            |                 |                                                 |                                               |                                       |
| 208   | T        | 1.000 | *   |                            |                 |                                                 |                                               |                                       |
| 209   | F        | 1.000 |     |                            |                 |                                                 |                                               |                                       |
| 210   | V        | 0.828 |     |                            |                 |                                                 |                                               |                                       |
| 211   | N        | 0.541 |     | D                          | 0.41            | human GR + 8others                              | 0                                             | no                                    |
| 212   | deletion |       |     |                            |                 |                                                 |                                               |                                       |
| 213   | K        | 0.999 |     |                            |                 |                                                 |                                               |                                       |
| 214   | S        | 0.747 |     | T                          | 0.22            | human GR + 8others                              | node 69, skateGR                              | no                                    |
| 215   | L        | 0.951 |     |                            |                 |                                                 |                                               |                                       |
| 216   | S        | 0.999 |     |                            |                 |                                                 |                                               |                                       |
| 217   | V        | 0.967 | *   |                            |                 |                                                 |                                               |                                       |
| 218   | E        | 1.000 |     |                            |                 |                                                 |                                               |                                       |
| 219   | F        | 1.000 | *   |                            |                 |                                                 |                                               |                                       |
| 220   | P        | 1.000 |     |                            |                 |                                                 |                                               |                                       |
| 221   | E        | 0.998 |     |                            |                 |                                                 |                                               |                                       |
| 222   | M        | 1.000 |     |                            |                 |                                                 |                                               |                                       |
| 223   | L        | 1.000 | *   |                            |                 |                                                 |                                               |                                       |
| 224   | A        | 0.977 |     |                            |                 |                                                 |                                               |                                       |
| 225   | E        | 1.000 |     |                            |                 |                                                 |                                               |                                       |
| 226   | I        | 1.000 |     |                            |                 |                                                 |                                               |                                       |
| 227   | I        | 1.000 |     |                            |                 |                                                 |                                               |                                       |
| 228   | S        | 0.995 |     |                            |                 |                                                 |                                               |                                       |
| 229   | N        | 0.999 |     |                            |                 |                                                 |                                               |                                       |
| 230   | Q        | 1.000 |     |                            |                 |                                                 |                                               |                                       |
| 231   | L        | 0.973 |     |                            |                 |                                                 |                                               |                                       |
| 232   | P        | 1.000 |     |                            |                 |                                                 |                                               |                                       |
| 233   | K        | 1.000 |     |                            |                 |                                                 |                                               |                                       |
| 234   | F        | 0.797 |     |                            |                 |                                                 |                                               |                                       |
| 235   | K        | 0.357 |     | S                          | 0.29            | human GR + 7others                              | 0                                             | no                                    |
| 236   | A        | 0.852 |     |                            |                 |                                                 |                                               |                                       |
| 237   | G        | 1.000 |     |                            |                 |                                                 |                                               |                                       |
| 238   | S        | 0.519 |     | N                          | 0.36            | human GR + 8others                              | 0                                             | no                                    |
| 239   | V        | 0.870 |     |                            |                 |                                                 |                                               |                                       |
| 240   | K        | 1.000 |     |                            |                 |                                                 |                                               |                                       |
| 241   | P        | 0.968 |     |                            |                 |                                                 |                                               |                                       |
| 242   | L        | 1.000 |     |                            |                 |                                                 |                                               |                                       |
| 243   | L        | 0.999 |     |                            |                 |                                                 |                                               |                                       |
| 244   | F        | 1.000 |     |                            |                 |                                                 |                                               |                                       |

| Site# | ML state | PP    | LBP | Alter-nate state (PP> 0.2) | PP of alt state | Aldo-insensitive receptors with alternate state | Aldo-activated receptors with alternate state | ML state in aldo-activated receptors? |
|-------|----------|-------|-----|----------------------------|-----------------|-------------------------------------------------|-----------------------------------------------|---------------------------------------|
| 245   | H        | 1.000 |     |                            |                 |                                                 |                                               |                                       |
| 246   | Q        | 0.988 |     |                            |                 |                                                 |                                               |                                       |
| 247   | K        | 0.999 |     |                            |                 |                                                 |                                               |                                       |
|       | mean     | 0.947 |     |                            |                 |                                                 |                                               |                                       |

**Table S4. Effect of permissive substitutions on AncGR1 ligand sensitivity.** Group Z consists of two substitutions (Q105L and N26T). These were introduced individually and in combination into the AncGR1 XY background, which includes group X substitutions (S106P, L111Q) and group Y (L29M, F981, S212Δ). Mutant receptors were then assessed for hormone responsiveness in a luciferase reporter transcription assay. Table shows the EC50 for each ligand – the concentration required for half-maximal activation. NA, no activation, defined as <2-fold maximal activation at up to 1000 nM hormone.

| Receptor                 | aldosterone | cortisol | DOC     |
|--------------------------|-------------|----------|---------|
| AncGR1 XY + Q105L + N26T | NA          | 308 nM   | 6400 nM |
| AncGR1 XY + Q105L        | NA          | 1190 μM  | NA      |
| AncGR1 XY + N26T         | NA          | 2200 μM  | NA      |
| AncGR1 XY                | NA          | 6250 μM  | NA      |

**Table S5. List of sequences used for phylogenetic analysis and reconstruction.**

| <b>Sequence name (on phylogeny)</b> | <b>Genbank ID</b> | <b>Species</b>             |
|-------------------------------------|-------------------|----------------------------|
| AcanthopagrusAR                     | 28974723          | Acanthopagrus schlegelii   |
| AlligatorGR                         | 22135433          | Alligator mississippiensis |
| AlligatorPR                         | 41386653          | Alligator mississippiensis |
| AstatilapiaARb                      | 19879685          | Astatotilapia burtoni      |
| AstatotilapiaGR1                    | 20563131          | Astatotilapia burtoni      |
| AstatotilapiaGR2                    | 20563133          | Astatotilapia burtoni      |
| AstatotilapiaMR                     | 20563137          | Astatotilapia burtoni      |
| CanaryAR                            | 414734            | Serinus canaria            |
| ChickMR                             | 30315964          | Gallus gallus              |
| ChickPR                             | 130893            | Gallus gallus              |
| CrocodilePR                         | 2564207           | Crocodylus siamensis       |
| DicentrarchusGR                     | 44889863          | Dicentrarchus labrax       |
| DogfishAR                           | 37909992          | Squalus acanthias          |
| EelARa                              | 7446192           | Anguilla japonica          |
| EelARb                              | 5821400           | Anguilla japonica          |
| EelPR1                              | 6716126           | Anguilla japonica          |
| EelPR2                              | 19386568          | Anguilla japonica          |
| GambusiaARa                         | 56783596          | Gambusia affinis           |
| GambusiaARb                         | 56783598          | Gambusia affinis           |
| GoldfishAR                          | 20135660          | Carassius auratus          |
| HagfishCR                           | DQ382336          | Myxine glutinosa           |
| HagfishSR2                          | DQ382337          | Myxine glutinosa           |
| HalichoeresAR                       | 12061008          | Halichoeres trimaculatus   |
| HaplochromisAR                      | 4583413           | Astatotilapia burtoni      |
| HumanAR                             | 4557331           | Homo sapiens               |
| HumanGR                             | 121069            | Homo sapiens               |
| HumanMR                             | 126885            | Homo sapiens               |
| HumanPR                             | 4505767           | Homo sapiens               |
| LampreyCR                           | 13919634          | Petromyzon marinus         |
| LampreySR2                          | 13919636          | Petromyzon marinus         |
| MedakaARa                           | 37359712          | Oryzias latipes            |
| MouseAR                             | 113831            | Mus musculus               |
| MousePR                             | 130895            | Mus musculus               |
| OreochromisARa                      | 12248398          | Oreochromis niloticus      |
| OreochromisARb                      | 12248400          | Oreochromis niloticus      |
| OreochromisPR                       | 31339298          | Oreochromis niloticus      |
| ParalichthysGR                      | 6016116           | Paralichthys olivaceus     |
| RanaAR                              | 46576435          | Rana catesbeiana           |
| RanaPR                              | 46577033          | Rana dybowskii             |
| RatGR                               | 19343485          | Rattus norvegicus          |
| RatMR                               | 126886            | Rattus norvegicus          |
| RedseabreamAR                       | 3668185           | Pagrus major               |
| SkateAR                             | DQ382340          | Raja erinacea              |
| SkateGR                             | DQ382338          | Raja erinacea              |
| SkateMR                             | DQ382339          | Raja erinacea              |
| SkatePR                             | DQ382341          | Raja erinacea              |
| SticklebackARb                      | 29568404          | Gasterosteus aculeatus     |
| TaeniopygiaAR                       | 22417219          | Taeniopygia guttata        |
| TroutARa                            | 3551156           | Oncorhynchus mykiss        |
| TroutARb                            | 3551158           | Oncorhynchus mykiss        |
| TroutGR1                            | 1730254           | Oncorhynchus mykiss        |



|                  |          |                                |
|------------------|----------|--------------------------------|
| TroutGR2         | 40548814 | <i>Oncorhynchus mykiss</i>     |
| TroutMRa         | 53766435 | <i>Oncorhynchus mykiss</i>     |
| TroutMRb         | 53766437 | <i>Oncorhynchus mykiss</i>     |
| WhiptaillizardPR | 1195594  | <i>Cnemidophorus uniparens</i> |
| XenopusAR        | 4038480  | <i>Xenopus laevis</i>          |
| XenopusGR        | 1730255  | <i>Xenopus laevis</i>          |
| XenopusMR        | 2500914  | <i>Xenopus laevis</i>          |
| XenopusPR        | 11991857 | <i>Xenopus laevis</i>          |

## REFERENCES FOR SUPPLEMENTAL DATA

1. Z. Yang, S. Kumar, M. Nei. *Genetics* 141, 1641 (1995).
2. J. T. Bridgham, S. M. Carroll, J. W. Thornton. *Science* 312, 97 (2006).
3. Z. Otwinowski, W. Minor. *Data collection and processing* (Warrington, UK, 1993).
4. P. Emsley, K. Cowtan. *Acta Crystallogr D Biol Crystallogr* 60, 2126 (2004).
5. A. T. Brunger *et al*, *Acta Crystallogr D Biol Crystallogr* 54 ( Pt 5), 905 (1998).
6. T. Schwede, J. Kopp, N. Guex, M. C. Peitsch. *Nucleic Acids Research* 31, 3381 (2003).
7. Y. Li, K. Suino, J. Daugherty, H. E. Xu. *Mol Cell* 19, 367 (2005).
